# Supplementary material for: Meta-analysis of erosive hand osteoarthritis identifies four common variants that associate with relatively large effect
Source: PubMed Central journal article supplement — Ann Rheum Dis. 2023 Mar 17;82(6):873–80. doi: 10.1136/ard-2022-223468 (PMC10314032; doi:10.1136/ard-2022-223468), 2023-03-17
Supplement: ard-2022-223468supp001.pdf [file ard-2022-223468supp001.pdf]

Supplementary Table 1. Association of EHOA GWS variants in the individual study populations

| rsName     | Chr   | Pos_build38 | Effect Allele | Other Allele | Freq (%) EA | P_value | OR   | P_value_GWS_t | P_bonferroni | P_het | I2   | Iceland<br>(N = 918 cases / 109,249 controls) |      |      |       | UK Biobank<br>(N = 63 cases / 430,875 controls) |      |      |       | The Netherlands<br>(N = 139 cases / 5,102 controls) |      |      |       | Spain<br>(N = 218 cases / 164 controls) |      |      |       | USA<br>(N = 145 cases / 5,308 controls) |      |      |       |
|------------|-------|-------------|---------------|--------------|-------------|---------|------|---------------|--------------|-------|------|-----------------------------------------------|------|------|-------|-------------------------------------------------|------|------|-------|-----------------------------------------------------|------|------|-------|-----------------------------------------|------|------|-------|-----------------------------------------|------|------|-------|
|            |       |             |               |              |             |         |      |               |              |       |      | Freq (%)                                      |      |      |       | Freq (%)                                        |      |      |       | Freq (%)                                            |      |      |       | Freq (%)                                |      |      |       | Freq (%)                                |      |      |       |
|            |       |             |               |              |             |         |      |               |              |       |      | P value                                       | OR   | EA   | Info  | P value                                         | OR   | EA   | Info  | P value                                             | OR   | EA   | Info  | P value                                 | OR   | EA   | Info  | P value                                 | OR   | EA   | Info  |
| rs17013495 | chr4  | 87885460    | C             | T            | 42.7        | 8.4E-14 | 0.72 | 1.2E-09       | 3.5E-06      | 0.18  | 36.9 | 2.5E-11                                       | 0.70 | 38.7 | 1.000 | 0.71                                            | 1.07 | 43.5 | 0.999 | 0.042                                               | 0.76 | 43.0 | 0.995 | 5.2E-03                                 | 0.60 | 45.9 | 0.987 | 0.020                                   | 0.71 | 42.3 | 0.990 |
| rs11243284 | chr6  | 8945086     | C             | T            | 29.8        | 4.2E-11 | 1.35 | 4.0E-10       | 5.2E-03      | 0.67  | 0    | 2.9E-08                                       | 1.35 | 29.5 | 1.000 | 0.33                                            | 1.20 | 30.3 | 1.000 | 0.15                                                | 1.22 | 29.7 | 0.987 | 0.011                                   | 1.71 | 29.7 | 0.817 | 0.018                                   | 1.47 | 30.0 | 0.867 |
| rs1800801  | chr12 | 14885854    | T             | C            | 39.0        | 3.6E-13 | 1.37 | 2.4E-09       | 7.5E-06      | 0.17  | 38.0 | 5.0E-07                                       | 1.30 | 37.2 | 1.000 | 8.3E-04                                         | 1.84 | 37.8 | 0.999 | 7.1E-05                                             | 1.70 | 37.4 | 1.000 | 0.14                                    | 1.29 | 45.1 | 0.989 | 0.026                                   | 1.38 | 37.3 | 0.988 |
| rs11631127 | chr15 | 57977811    | G             | C            | 47.8        | 7.1E-18 | 0.69 | 4.0E-10       | 8.9E-10      | 0.59  | 0    | 2.3E-11                                       | 0.70 | 42.4 | 1.000 | 0.25                                            | 0.81 | 46.5 | 1.000 | 8.4E-05                                             | 0.60 | 47.3 | 0.998 | 0.058                                   | 0.70 | 55.8 | 0.995 | 5.6E-04                                 | 0.61 | 47.1 | 0.994 |

**Supplementary Table 2. Association of EHOA variants with EHOA under additive, recessive and full genotype models**

| Variant[allele] | Chr   | Genotype specific model |          |                  |                     |          |                  |                     |          |                  |                     |          |                  |         |
|-----------------|-------|-------------------------|----------|------------------|---------------------|----------|------------------|---------------------|----------|------------------|---------------------|----------|------------------|---------|
|                 |       | Additive model          |          |                  | Recessive model     |          |                  | Heterozygotes       |          |                  | Homozygotes         |          |                  | P model |
|                 |       | OR (95% CI)             | P value  | P <sub>het</sub> | OR (95% CI)         | P value  | P <sub>het</sub> | OR (95% CI)         | P value  | P <sub>het</sub> | OR (95% CI)         | P value  | P <sub>het</sub> |         |
| rs17013495[T]   | chr4  | 1.395 (1.279-1.522)     | 8.77E-14 | 0.17             | 1.600 (1.346-1.901) | 9.64E-08 | 0.16             | 1.342 (1.098-1.641) | 0.0041   | 0.48             | 2.011 (1.630-2.481) | 7.07E-11 | 0.63             | 0.289   |
| rs11243284[C]   | chr6  | 1.354 (1.237-1.482)     | 4.22E-11 | 0.67             | 1.674 (1.387-2.022) | 8.47E-08 | 0.41             | 1.307 (1.147-1.491) | 6.27E-05 | 0.77             | 1.773 (1.457-2.157) | 1.07E-08 | 0.66             | 0.446   |
| rs1800801[T]    | chr12 | 1.368 (1.257-1.488)     | 3.55E-13 | 0.17             | 1.848 (1.594-2.143) | 3.86E-16 | 0.14             | 1.151 (1.002-1.323) | 0.047    | 0.87             | 2.012 (1.705-2.373) | 1.09E-16 | 0.34             | 0.0011  |
| rs11631127[C]   | chr15 | 1.456 (1.337-1.587)     | 7.15E-18 | 0.59             | 1.608 (1.376-1.880) | 2.68E-09 | 0.45             | 1.320 (1.095-1.591) | 0.0036   | 0.42             | 2.089 (1.726-2.528) | 3.69E-14 | 0.48             | 0.241   |

Association of the four EHOA variants with EHOA is shown for the additive model, the recessive model, and for the full model evaluating risk at the heterozygous genotypes and homozygous genotypes. The effect allele of each variant is shown within square brackets, with the odds ratio (OR) with 95% confidence interval (CI), the P value, and the heterogeneity P value (P<sub>het</sub>) for each model, and the P value (P model) for deviation from the additive model.

Supplementary Table 3. Association of rs1800801 in 5'UTR of MGP with hand osteoarthritis subtypes under additive, recessive and full genotype model

| Phenotype       | N cases / N controls | Genotype specific model |         |       |                     |          |       |                     |         |      |                     |         |       |         |
|-----------------|----------------------|-------------------------|---------|-------|---------------------|----------|-------|---------------------|---------|------|---------------------|---------|-------|---------|
|                 |                      | Additive model          |         |       | Recessive model     |          |       | Heterozygotes       |         |      | Homozygotes         |         |       |         |
|                 |                      | OR (95% CI)             | P value | Phet  | OR (95% CI)         | P value  | Phet  | OR (95% CI)         | P value | Phet | OR (95% CI)         | P value | Phet  | P model |
| Erosive hand OA | 1,484 / 550,680      | 1.368 (1.257-1.488)     | 3.6E-13 | 0.17  | 1.848 (1.594-2.143) | 3.9E-16  | 0.14  | 1.151 (1.002-1.323) | 0.047   | 0.87 | 2.012 (1.705-2.373) | 1.1E-16 | 0.34  | 0.0011  |
| Finger OA       | 7,871 / 608,869      | 1.143 (1.099-1.188)     | 1.5E-11 | 0.026 | 1.258 (1.173-1.349) | 1.1E-10  | 0.035 | 1.103 (1.037-1.173) | 0.0017  | 0.60 | 1.349 (1.242-1.464) | 1.0E-12 | 0.031 | 0.12    |
| Thumb OA        | 9,865 / 623,814      | 1.066 (1.031-1.103)     | 1.6E-04 | 0.28  | 1.064 (0.999-1.133) | 0.055    | 0.22  | 1.108 (1.052-1.166) | 1.0E-04 | 0.44 | 1.129 (1.050-1.214) | 0.0010  | 0.19  | 0.056   |
| Hand OA         | 14,841 / 626,618     | 1.080 (1.050-1.111)     | 8.4E-08 | 0.081 | 1.132 (1.074-1.193) | 3.31E-06 | 0.059 | 1.073 (1.027-1.120) | 0.0016  | 0.34 | 1.181 (1.112-1.254) | 6.8E-08 | 0.08  | 0.19    |

Association of the rs180081[T] with hand osteoarthritis subtypes is shown for the additive model, the recessive model, and for the full model evaluating risk at the heterozygous genotypes and homozygous genotypes. The odds ratio (OR) with 95% confidence interval (CI), the P value, and the heterogeneity P value (Phet) is shown for each model, and the P value (P model) for deviation from the additive model. The finger, thumb and hand OA analysis included data from Iceland, US, UK, and The Netherlands, whereas all datasets were included in the erosive hand OA analysis.

**Supplementary Table 4. EHOA variants, or their correlated variants, are located in regions defined as candidate cis-regulatory elements by ENCODE project (screen.encodeproject.org).**

| cCRE annotation:                                   | GWAS association, lead sequence variant for each signal |                                               |                                                                                                                                                                                                                                                                                                                                                                                                                                                                        |                                                  |
|----------------------------------------------------|---------------------------------------------------------|-----------------------------------------------|------------------------------------------------------------------------------------------------------------------------------------------------------------------------------------------------------------------------------------------------------------------------------------------------------------------------------------------------------------------------------------------------------------------------------------------------------------------------|--------------------------------------------------|
|                                                    | rs17013495<br>(chr4:87885460)<br>LD class = 68          | rs11243284<br>(chr6:8945086)<br>LD class = 17 | rs1800801<br>(chr12:14885854)<br>LD class = 107                                                                                                                                                                                                                                                                                                                                                                                                                        | rs11631127<br>(chr15:57977811)<br>LD class = 155 |
| DNase-H3K4me3                                      |                                                         |                                               |                                                                                                                                                                                                                                                                                                                                                                                                                                                                        | chr15:58008570:SG                                |
| Promoter-like sequence (PLS)                       |                                                         |                                               |                                                                                                                                                                                                                                                                                                                                                                                                                                                                        | chr15:58065219:IG                                |
| Promoter-like sequence (PLS)-CTCF-bound            |                                                         |                                               | chr12:14885854:SG<br>chr12:14834162:SG,<br>chr12:14834298:SG,<br>chr12:14836364:SG,<br>chr12:14851053:SG,<br>chr12:14851097:IG,<br>chr12:14899824:SG,<br>chr12:14899901:SG,<br>chr12:14900018:SG,<br>chr12:14910656:SG,<br>chr12:14911149:IG,<br>chr12:14911328:SG,<br>chr12:14911429:SG<br>chr12:14847029:SG,<br>chr12:14847226:SG,<br>chr12:14854918:IG,<br>chr12:14901082:SG<br>chr12:14839301:SG,<br>chr12:14840674:SG,<br>chr12:14840920:SG,<br>chr12:14883768:SG |                                                  |
| Enhancer-like sequence, distal (dELS)              | chr4:87868563:SG,<br>chr4:87868643:SG                   | chr6:8948008:SG,<br>chr6:8948226:SG           |                                                                                                                                                                                                                                                                                                                                                                                                                                                                        | chr15:58040343:SG,<br>chr15:58040385:SG          |
| Enhancer-like sequence, distal (dELS)-CTCF-bound   | chr4:87863666:SG,<br>chr4:87885460:SG                   | chr6:8949691:SG                               |                                                                                                                                                                                                                                                                                                                                                                                                                                                                        | chr15:57923529:SG                                |
| Enhancer-like sequence, proximal (pELS)            |                                                         |                                               |                                                                                                                                                                                                                                                                                                                                                                                                                                                                        | chr15:58063976:IG,<br>chr15:58064657:SG          |
| Enhancer-like sequence, proximal (pELS)-CTCF bound |                                                         |                                               |                                                                                                                                                                                                                                                                                                                                                                                                                                                                        | chr15:58064164:SG                                |

The variants are shown by their position in Build38, with SG ending for SNPs and IG for indels



|                                                                                                                                  |                                                                                                          |                                      |                                                                                                                                                                                                                                                                                                                                                                                                                                                                                                                                                                                                  |                                                                                                                                                                                                                                                                                                                                                            |
|----------------------------------------------------------------------------------------------------------------------------------|----------------------------------------------------------------------------------------------------------|--------------------------------------|--------------------------------------------------------------------------------------------------------------------------------------------------------------------------------------------------------------------------------------------------------------------------------------------------------------------------------------------------------------------------------------------------------------------------------------------------------------------------------------------------------------------------------------------------------------------------------------------------|------------------------------------------------------------------------------------------------------------------------------------------------------------------------------------------------------------------------------------------------------------------------------------------------------------------------------------------------------------|
| gastroesophageal sphincter<br>germinal center                                                                                    | UBERON_000450<br>UBERON_0010754                                                                          | chr4:87863666:SG<br>chr4:87885460:SG | chr12:14847029:SG, chr12:14847226:SG, chr12:14883768:SG,<br>chr12:14885854:SG, chr12:14901082:SG<br>chr12:1484918:IG<br>chr12:14834162:SG, chr12:14834298:SG, chr12:14836364:SG,<br>chr12:14847029:SG, chr12:14847226:SG, chr12:14883768:SG,<br>chr12:14885854:SG, chr12:14901082:SG, chr12:14883768:SG,<br>chr12:14847029:SG, chr12:14847226:SG, chr12:14885854:SG,<br>chr12:14910656:SG                                                                                                                                                                                                        | chr15:57923529:SG, chr15:58064657:SG,<br>chr15:58065219:IG<br>chr15:57923529:SG                                                                                                                                                                                                                                                                            |
| glomerular endothelial cell<br>glutamatergic neuron                                                                              | CL_0002188<br>CL_0000679                                                                                 | chr6:8949691:SG                      |                                                                                                                                                                                                                                                                                                                                                                                                                                                                                                                                                                                                  | chr15:57923529:SG, chr15:58063976:IG,<br>chr15:58064164:SG, chr15:58064657:SG,<br>chr15:58065219:IG<br>chr15:57923529:SG, chr15:58063976:IG,<br>chr15:58064164:SG, chr15:58064657:SG,<br>chr15:58065219:IG                                                                                                                                                 |
| heart                                                                                                                            | UBERON_0000948                                                                                           |                                      | chr12:14834162:SG, chr12:14834298:SG, chr12:14836364:SG,<br>chr12:14883768:SG, chr12:14885854:SG, chr12:14901082:SG<br>chr12:14834162:SG, chr12:14834298:SG, chr12:14836364:SG,<br>chr12:14847029:SG, chr12:14847226:SG, chr12:14883768:SG,<br>chr12:14885854:SG, chr12:14901082:SG                                                                                                                                                                                                                                                                                                              | chr15:57923529:SG, chr15:58063976:IG,<br>chr15:58064164:SG, chr15:58064657:SG,<br>chr15:58065219:IG<br>chr15:57923529:SG, chr15:58063976:IG,<br>chr15:58064164:SG, chr15:58064657:SG,<br>chr15:58065219:IG                                                                                                                                                 |
| heart left ventricle                                                                                                             | UBERON_0002084                                                                                           |                                      | chr12:14834162:SG, chr12:14834298:SG, chr12:14883768:SG,<br>chr12:14885854:SG, chr12:14901082:SG<br>chr12:14834162:SG, chr12:14834298:SG, chr12:14883768:SG,<br>chr12:14885854:SG, chr12:14901082:SG                                                                                                                                                                                                                                                                                                                                                                                             | chr15:57923529:SG, chr15:58063976:IG,<br>chr15:58064164:SG, chr15:58064657:SG,<br>chr15:58065219:IG<br>chr15:57923529:SG, chr15:58063976:IG,<br>chr15:58064164:SG, chr15:58064657:SG,<br>chr15:58065219:IG                                                                                                                                                 |
| heart right ventricle                                                                                                            | UBERON_0002080                                                                                           |                                      | chr12:14834162:SG, chr12:14834298:SG, chr12:14883768:SG,<br>chr12:14885854:SG, chr12:14901082:SG<br>chr12:14834162:SG, chr12:14834298:SG, chr12:14883768:SG,<br>chr12:14885854:SG, chr12:14901082:SG                                                                                                                                                                                                                                                                                                                                                                                             | chr15:57923529:SG, chr15:58063976:IG,<br>chr15:58064164:SG, chr15:58064657:SG,<br>chr15:58065219:IG<br>chr15:57923529:SG, chr15:58063976:IG,<br>chr15:58064164:SG, chr15:58064657:SG,<br>chr15:58065219:IG                                                                                                                                                 |
| hematopoietic multipotent progenitor cell<br>hepatocyte                                                                          | CL_0000837<br>CL_0000182                                                                                 | chr4:87885460:SG                     | chr12:14839301:SG, chr12:14840674:SG, chr12:14840920:SG,<br>chr12:14885854:SG, chr12:14901082:SG<br>chr12:14839301:SG, chr12:14840674:SG, chr12:14840920:SG,<br>chr12:14885854:SG, chr12:14901082:SG                                                                                                                                                                                                                                                                                                                                                                                             | chr15:58064164:SG, chr15:58064657:SG,<br>chr15:58065219:IG<br>chr15:58064164:SG, chr15:58064657:SG,<br>chr15:58065219:IG                                                                                                                                                                                                                                   |
| hindlimb muscle<br>immature natural killer cell<br>inferior parietal cortex<br>inflammatory macrophage                           | UBERON_0003663<br>CL_0000823<br>UBERON_0006088<br>CL_0000863                                             |                                      | chr12:1483768:SG, chr12:14885854:SG<br>chr12:14883768:SG<br>chr12:14836364:SG<br>chr12:14836364:SG, chr12:14910656:SG,<br>chr12:14836364:SG                                                                                                                                                                                                                                                                                                                                                                                                                                                      | chr15:57923529:SG, chr15:58065219:IG<br>chr15:58065219:IG<br>chr15:58065219:IG<br>chr15:58065219:IG                                                                                                                                                                                                                                                        |
| iris pigment epithelial cell<br>keratinocyte                                                                                     | CL_0002565<br>CL_0000312                                                                                 | chr4:87863666:SG                     | chr12:14847029:SG, chr12:14847226:SG, chr12:14854918:IG,<br>chr12:14883768:SG, chr12:14885854:SG<br>chr12:14847029:SG, chr12:14847226:SG, chr12:14854918:IG,<br>chr12:14883768:SG, chr12:14885854:SG                                                                                                                                                                                                                                                                                                                                                                                             | chr15:57923529:SG, chr15:58063976:IG,<br>chr15:58064164:SG, chr15:58064657:SG,<br>chr15:58065219:IG<br>chr15:57923529:SG, chr15:58063976:IG,<br>chr15:58064164:SG, chr15:58064657:SG,<br>chr15:58065219:IG                                                                                                                                                 |
| kidney<br>kidney capillary endothelial cell<br>kidney epithelial cell<br>kidney glomerular epithelial cell<br>kidney tubule cell | UBERON_0002113<br>CL_1000892<br>CL_0002518<br>CL_1000510<br>CL_1000507                                   | chr4:87863666:SG                     | chr12:14836364:SG, chr12:14910656:SG, chr12:14836364:SG,<br>chr12:14836364:SG<br>chr12:14836364:SG, chr12:14836364:SG<br>chr12:14836364:SG, chr12:14836364:SG<br>chr12:14836364:SG, chr12:14836364:SG                                                                                                                                                                                                                                                                                                                                                                                            | chr15:58065219:IG<br>chr15:58065219:IG<br>chr15:58065219:IG<br>chr15:58065219:IG                                                                                                                                                                                                                                                                           |
| large intestine<br>layer of hippocampus<br>left cardiac atrium<br>left colon<br>left forelimb<br>left hindlimb                   | UBERON_0000059<br>UBERON_0002305<br>UBERON_0002079<br>UBERON_0008971<br>UBERON_8300002<br>UBERON_8300004 | chr4:87868563:SG, chr4:87868643:SG   | chr12:14836364:SG, chr12:14883768:SG, chr12:14885854:SG,<br>chr12:14911429:SG, chr12:14911328:SG, chr12:14911429:SG<br>chr12:14885854:SG<br>chr12:14885854:SG<br>chr12:1491149:IG, chr12:14911328:SG, chr12:14911429:SG<br>chr12:14885854:SG<br>chr12:14847029:SG, chr12:14847226:SG, chr12:14854918:IG,<br>chr12:14883768:SG, chr12:14885854:SG                                                                                                                                                                                                                                                 | chr15:57923529:SG, chr15:58040343:SG,<br>chr15:58040385:SG, chr15:58064164:SG,<br>chr15:58064657:SG, chr15:58065219:IG<br>chr15:58065219:IG<br>chr15:57923529:SG, chr15:58065219:IG<br>chr15:58065219:IG<br>chr15:57923529:SG, chr15:58063976:IG,<br>chr15:58064164:SG, chr15:58064657:SG,<br>chr15:58065219:IG                                            |
| left kidney<br>left lobe of liver                                                                                                | UBERON_0004538<br>UBERON_0001115                                                                         |                                      | chr12:14847029:SG, chr12:14847226:SG, chr12:14854918:IG,<br>chr12:14883768:SG, chr12:14885854:SG<br>chr12:14847029:SG, chr12:14847226:SG, chr12:14854918:IG,<br>chr12:14883768:SG, chr12:14885854:SG                                                                                                                                                                                                                                                                                                                                                                                             | chr15:57923529:SG, chr15:58063976:IG,<br>chr15:58064164:SG, chr15:58064657:SG,<br>chr15:58065219:IG<br>chr15:57923529:SG, chr15:58063976:IG,<br>chr15:58064164:SG, chr15:58064657:SG,<br>chr15:58065219:IG                                                                                                                                                 |
| left lung                                                                                                                        | UBERON_0002168                                                                                           |                                      | chr12:14854918:IG, chr12:14883768:SG, chr12:14885854:SG<br>chr12:14847029:SG, chr12:14847226:SG, chr12:14854918:IG,<br>chr12:14883768:SG, chr12:14885854:SG                                                                                                                                                                                                                                                                                                                                                                                                                                      | chr15:57923529:SG, chr15:58063976:IG,<br>chr15:58064164:SG, chr15:58064657:SG,<br>chr15:58065219:IG<br>chr15:57923529:SG, chr15:58063976:IG,<br>chr15:58064164:SG, chr15:58064657:SG,<br>chr15:58065219:IG                                                                                                                                                 |
| left renal cortex interstitium                                                                                                   | UBERON_0018117                                                                                           |                                      | chr12:14847029:SG, chr12:14847226:SG, chr12:14854918:IG,<br>chr12:14883768:SG, chr12:14885854:SG                                                                                                                                                                                                                                                                                                                                                                                                                                                                                                 | chr15:57923529:SG, chr15:58063976:IG,<br>chr15:58064164:SG, chr15:58064657:SG,<br>chr15:58065219:IG                                                                                                                                                                                                                                                        |
| left renal pelvis                                                                                                                | UBERON_0018115                                                                                           |                                      | chr12:14883768:SG, chr12:14885854:SG<br>chr12:14883768:SG, chr12:14885854:SG                                                                                                                                                                                                                                                                                                                                                                                                                                                                                                                     | chr15:57923529:SG, chr15:58064164:SG,<br>chr15:58064657:SG, chr15:58065219:IG<br>chr15:57923529:SG, chr15:58064164:SG,<br>chr15:58064657:SG, chr15:58065219:IG                                                                                                                                                                                             |
| limb                                                                                                                             | UBERON_0002101                                                                                           |                                      | chr12:14834162:SG, chr12:14834298:SG, chr12:14836364:SG,<br>chr12:14840674:SG, chr12:14840920:SG<br>chr12:14834162:SG, chr12:14834298:SG, chr12:14836364:SG,<br>chr12:14840674:SG, chr12:14840920:SG                                                                                                                                                                                                                                                                                                                                                                                             | chr15:57923529:SG, chr15:58040385:SG<br>chr15:57923529:SG, chr15:58040385:SG                                                                                                                                                                                                                                                                               |
| liver<br>lower leg skin<br>lower lobe of left lung                                                                               | UBERON_0002107<br>UBERON_0002164<br>UBERON_0008953                                                       | chr4:87863666:SG                     | chr12:14836364:SG, chr12:14847029:SG, chr12:14847226:SG,<br>chr12:14883768:SG, chr12:14885854:SG, chr12:14901082:SG<br>chr12:14836364:SG, chr12:14836364:SG<br>chr12:14836364:SG, chr12:14836364:SG                                                                                                                                                                                                                                                                                                                                                                                              | chr15:57923529:SG, chr15:58040343:SG,<br>chr15:58040385:SG, chr15:58063976:IG,<br>chr15:58064164:SG, chr15:58064657:SG,<br>chr15:58065219:IG<br>chr15:58065219:IG<br>chr15:57923529:SG, chr15:58063976:IG,<br>chr15:58064164:SG, chr15:58064657:SG,<br>chr15:58065219:IG                                                                                   |
| lung                                                                                                                             | UBERON_0002048                                                                                           |                                      | chr12:14834162:SG, chr12:14834298:SG, chr12:14836364:SG,<br>chr12:14840674:SG, chr12:14840920:SG, chr12:14847029:SG,<br>chr12:14847226:SG, chr12:14883768:SG, chr12:14885854:SG,<br>chr12:14910656:SG<br>chr12:14836364:SG, chr12:14885854:SG, chr12:14910656:SG,<br>chr12:1491149:IG, chr12:14911328:SG, chr12:14911429:SG<br>chr12:14834162:SG, chr12:14834298:SG, chr12:14836364:SG,<br>chr12:14840674:SG, chr12:14840920:SG, chr12:14847029:SG,<br>chr12:14847226:SG, chr12:14883768:SG, chr12:14885854:SG,<br>chr12:14910656:SG, chr12:14836364:SG,<br>chr12:14854918:IG, chr12:14885854:SG | chr15:57923529:SG, chr15:58040343:SG,<br>chr15:58040385:SG, chr15:58063976:IG,<br>chr15:58064164:SG, chr15:58064657:SG,<br>chr15:58065219:IG<br>chr15:57923529:SG, chr15:58063976:IG,<br>chr15:58064164:SG, chr15:58064657:SG,<br>chr15:58065219:IG<br>chr15:57923529:SG, chr15:58063976:IG,<br>chr15:58064164:SG, chr15:58064657:SG,<br>chr15:58065219:IG |
| lung microvascular endothelial cell                                                                                              | CL_2000016                                                                                               |                                      | chr12:14836364:SG, chr12:14885854:SG, chr12:14910656:SG,<br>chr12:1491149:IG, chr12:14911328:SG, chr12:14911429:SG<br>chr12:14834162:SG, chr12:14834298:SG, chr12:14836364:SG,<br>chr12:14840674:SG, chr12:14840920:SG, chr12:14847029:SG,<br>chr12:14847226:SG, chr12:14883768:SG, chr12:14885854:SG,<br>chr12:14910656:SG, chr12:14836364:SG,<br>chr12:14854918:IG, chr12:14885854:SG                                                                                                                                                                                                          | chr15:58040343:SG, chr15:58040385:SG<br>chr15:57923529:SG, chr15:58063976:IG,<br>chr15:58064164:SG, chr15:58064657:SG,<br>chr15:58065219:IG<br>chr15:57923529:SG, chr15:58063976:IG,<br>chr15:58064164:SG, chr15:58064657:SG,<br>chr15:58065219:IG                                                                                                         |
| mammary gland epithelial cell<br>medulla oblongata                                                                               | CL_0002327<br>UBERON_0001896                                                                             |                                      | chr12:14836364:SG, chr12:14885854:SG, chr12:14910656:SG,<br>chr12:1491149:IG, chr12:14911328:SG, chr12:14911429:SG<br>chr12:14834162:SG, chr12:14834298:SG, chr12:14836364:SG,<br>chr12:14840674:SG, chr12:14840920:SG, chr12:14847029:SG,<br>chr12:14847226:SG, chr12:14883768:SG, chr12:14885854:SG,<br>chr12:14910656:SG, chr12:14836364:SG,<br>chr12:14854918:IG, chr12:14885854:SG                                                                                                                                                                                                          | chr15:58040343:SG, chr15:58040385:SG<br>chr15:57923529:SG, chr15:58063976:IG,<br>chr15:58064164:SG, chr15:58064657:SG,<br>chr15:58065219:IG                                                                                                                                                                                                                |
| mesenchymal stem cell                                                                                                            | CL_0000134                                                                                               |                                      | chr12:14834162:SG, chr12:14834298:SG, chr12:14836364:SG,<br>chr12:14840674:SG, chr12:14840920:SG, chr12:14847029:SG,<br>chr12:14847226:SG, chr12:14883768:SG, chr12:14885854:SG,<br>chr12:14910656:SG, chr12:14836364:SG,<br>chr12:14854918:IG, chr12:14885854:SG                                                                                                                                                                                                                                                                                                                                | chr15:57923529:SG, chr15:58063976:IG,<br>chr15:58064164:SG, chr15:58064657:SG,<br>chr15:58065219:IG<br>chr15:57923529:SG, chr15:58063976:IG,<br>chr15:58064164:SG, chr15:58064657:SG,<br>chr15:58065219:IG                                                                                                                                                 |
| mesodermal cell<br>middle frontal area -8<br>middle frontal gyrus                                                                | CL_0000222<br>UBERON_0006483<br>UBERON_0002702                                                           |                                      | chr12:14883768:SG, chr12:14885854:SG<br>chr12:14883768:SG, chr12:14885854:SG<br>chr12:14883768:SG, chr12:14885854:SG                                                                                                                                                                                                                                                                                                                                                                                                                                                                             | chr15:57923529:SG<br>chr15:57923529:SG, chr15:58065219:IG<br>chr15:57923529:SG, chr15:58065219:IG                                                                                                                                                                                                                                                          |
| mucosa of descending colon<br>mucosa of gallbladder                                                                              | UBERON_0004992<br>UBERON_0005033                                                                         |                                      | chr12:14885854:SG, chr12:1491149:IG, chr12:14911328:SG,<br>chr12:14911429:SG<br>chr12:14885854:SG<br>chr12:14883768:SG, chr12:14885854:SG, chr12:1491149:IG,<br>chr12:14911328:SG, chr12:14911429:SG                                                                                                                                                                                                                                                                                                                                                                                             | chr15:57923529:SG<br>chr15:57923529:SG, chr15:58065219:IG<br>chr15:57923529:SG, chr15:58065219:IG                                                                                                                                                                                                                                                          |
| mucosa of rectum<br>mucosa of stomach                                                                                            | UBERON_0003346<br>UBERON_0001199                                                                         |                                      | chr12:14885854:SG<br>chr12:14885854:SG<br>chr12:14834162:SG, chr12:14834298:SG, chr12:14836364:SG,<br>chr12:14840674:SG, chr12:14840920:SG, chr12:14847029:SG,<br>chr12:14847226:SG, chr12:14883768:SG, chr12:14885854:SG,<br>chr12:14910656:SG, chr12:14836364:SG,<br>chr12:14854918:IG, chr12:14885854:SG                                                                                                                                                                                                                                                                                      | chr15:57923529:SG<br>chr15:57923529:SG<br>chr15:57923529:SG, chr15:58063976:IG,<br>chr15:58064164:SG, chr15:58064657:SG,<br>chr15:58065219:IG                                                                                                                                                                                                              |
| muscle cell<br>muscle layer of colon<br>muscle layer of duodenum                                                                 | CL_0000187<br>UBERON_0012489<br>UBERON_0012488                                                           |                                      | chr12:14834162:SG, chr12:14834298:SG, chr12:14836364:SG,<br>chr12:14840674:SG, chr12:14840920:SG, chr12:14847029:SG,<br>chr12:14847226:SG, chr12:14883768:SG, chr12:14885854:SG,<br>chr12:14910656:SG, chr12:14836364:SG,<br>chr12:14854918:IG, chr12:14885854:SG                                                                                                                                                                                                                                                                                                                                | chr15:57923529:SG, chr15:58063976:IG,<br>chr15:58064164:SG, chr15:58064657:SG,<br>chr15:58065219:IG<br>chr15:57923529:SG, chr15:58063976:IG,<br>chr15:58064164:SG, chr15:58064657:SG,<br>chr15:58065219:IG                                                                                                                                                 |
| muscle of arm                                                                                                                    | UBERON_0001499                                                                                           |                                      | chr12:14836364:SG, chr12:14847029:SG, chr12:14847226:SG,<br>chr12:14854918:IG, chr12:14883768:SG, chr12:14885854:SG                                                                                                                                                                                                                                                                                                                                                                                                                                                                              | chr15:57923529:SG, chr15:58064164:SG,<br>chr15:58064657:SG, chr15:58065219:IG<br>chr15:57923529:SG, chr15:58063976:IG,<br>chr15:58064164:SG, chr15:58064657:SG,<br>chr15:58065219:IG                                                                                                                                                                       |
| muscle of back                                                                                                                   | UBERON_0002324                                                                                           |                                      | chr12:14847029:SG, chr12:14847226:SG, chr12:14854918:IG,<br>chr12:14883768:SG, chr12:14885854:SG                                                                                                                                                                                                                                                                                                                                                                                                                                                                                                 | chr15:57923529:SG, chr15:58063976:IG,<br>chr15:58064164:SG, chr15:58064657:SG,<br>chr15:58065219:IG                                                                                                                                                                                                                                                        |
| muscle of leg<br>myoepithelial cell of mammary gland<br>myotube                                                                  | UBERON_0001383<br>CL_0002324<br>CL_0002372                                                               |                                      | chr12:14885854:SG<br>chr12:14885854:SG<br>chr12:14836364:SG                                                                                                                                                                                                                                                                                                                                                                                                                                                                                                                                      | chr15:58065219:IG<br>chr15:58065219:IG<br>chr15:57923529:SG                                                                                                                                                                                                                                                                                                |
| naive thymus-derived CD4-positive, alpha-beta T cell<br>natural killer cell                                                      | CL_0000895<br>CL_0000823                                                                                 |                                      | chr12:14885854:SG<br>chr12:14885854:SG<br>chr12:14883768:SG, chr12:14885854:SG                                                                                                                                                                                                                                                                                                                                                                                                                                                                                                                   | chr15:58065219:IG<br>chr15:58064657:SG<br>chr15:57923529:SG, chr15:58063976:IG,<br>chr15:58064164:SG, chr15:58064657:SG,<br>chr15:58065219:IG                                                                                                                                                                                                              |
| nephron<br>neural cell<br>neural crest cell<br>neural progenitor cell                                                            | UBERON_0001285<br>CL_0002319<br>CL_0011012<br>CL_0011020                                                 |                                      | chr12:14883768:SG, chr12:14885854:SG<br>chr12:14851053:SG, chr12:14851097:IG                                                                                                                                                                                                                                                                                                                                                                                                                                                                                                                     | chr15:58065219:IG<br>chr15:58065219:IG<br>chr15:58065219:IG<br>chr15:58064164:SG, chr15:58064657:SG,<br>chr15:58065219:IG                                                                                                                                                                                                                                  |
| neuroepithelial stem cell                                                                                                        | CL_0002259                                                                                               |                                      |                                                                                                                                                                                                                                                                                                                                                                                                                                                                                                                                                                                                  | chr15:58065219:IG                                                                                                                                                                                                                                                                                                                                          |
| neuronal stem cell<br>neutrophil                                                                                                 | UBERON_0000047<br>CL_0000775                                                                             |                                      | chr12:14836364:SG, chr12:14847029:SG, chr12:14847226:SG,<br>chr12:14910656:SG                                                                                                                                                                                                                                                                                                                                                                                                                                                                                                                    | chr15:58065219:IG<br>chr15:58065219:IG                                                                                                                                                                                                                                                                                                                     |
| non-pigmented ciliary epithelial cell<br>omental fat pad                                                                         | CL_0002304<br>UBERON_0010414                                                                             |                                      |                                                                                                                                                                                                                                                                                                                                                                                                                                                                                                                                                                                                  | chr15:58065219:IG                                                                                                                                                                                                                                                                                                                                          |
| ovary                                                                                                                            | UBERON_0000992                                                                                           |                                      | chr12:14847029:SG, chr12:14847226:SG, chr12:14885854:SG,<br>chr12:14834162:SG, chr12:14834298:SG, chr12:14836364:SG,<br>chr12:14847029:SG, chr12:14847226:SG, chr12:14885854:SG                                                                                                                                                                                                                                                                                                                                                                                                                  | chr15:57923529:SG, chr15:58063976:IG,<br>chr15:58064164:SG, chr15:58064657:SG,<br>chr15:58065219:IG<br>chr15:58065219:IG                                                                                                                                                                                                                                   |
| pancreas<br>peripheral blood mononuclear cell<br>Peeters patch                                                                   | UBERON_0001264<br>CL_2000011<br>UBERON_0001211                                                           |                                      | chr12:14836364:SG, chr12:14840674:SG, chr12:14840920:SG,<br>chr12:14851053:SG, chr12:14851097:IG, chr12:14885854:SG,<br>chr12:14836364:SG<br>chr12:14883768:SG, chr12:14885854:SG                                                                                                                                                                                                                                                                                                                                                                                                                | chr15:58064657:SG, chr15:58065219:IG<br>chr15:58064657:SG, chr15:58065219:IG<br>chr15:58040343:SG, chr15:58040385:SG                                                                                                                                                                                                                                       |
| placenta<br>podocyte<br>posterior cingulate gyrus                                                                                | UBERON_0001987<br>CL_0000653<br>UBERON_0002740                                                           | chr4:87863666:SG                     | chr12:14836364:SG, chr12:14840674:SG, chr12:14840920:SG,<br>chr12:14851053:SG, chr12:14851097:IG, chr12:14885854:SG,<br>chr12:14836364:SG<br>chr12:14883768:SG, chr12:14885854:SG                                                                                                                                                                                                                                                                                                                                                                                                                | chr15:58064657:SG, chr15:58065219:IG<br>chr15:58064657:SG, chr15:58065219:IG<br>chr15:58063976:IG, chr15:58064164:SG,<br>chr15:58064657:SG, chr15:58065219:IG                                                                                                                                                                                              |
| prostate gland                                                                                                                   | UBERON_0002367                                                                                           |                                      | chr12:14834162:SG, chr12:14834298:SG, chr12:14836364:SG,<br>chr12:14839301:SG, chr12:14883768:SG, chr12:14885854:SG,<br>chr12:14901082:SG<br>chr12:14836364:SG, chr12:14847029:SG, chr12:14847226:SG,<br>chr12:14885854:SG                                                                                                                                                                                                                                                                                                                                                                       | chr15:58064657:SG, chr15:58065219:IG<br>chr15:57923529:SG, chr15:58064164:SG,<br>chr15:58064657:SG, chr15:58065219:IG<br>chr15:57923529:SG                                                                                                                                                                                                                 |
| psaos muscle                                                                                                                     | UBERON_0008450                                                                                           |                                      | chr12:14836364:SG, chr12:14847029:SG, chr                                                                                                                                                                                                                                                                                                                                                                                                                                                                                                                                                        |                                                                                                                                                                                                                                                                                                                                                            |

|                                             |                |                                                      |                                                                                                                                                                           |                                                                                                                                     |
|---------------------------------------------|----------------|------------------------------------------------------|---------------------------------------------------------------------------------------------------------------------------------------------------------------------------|-------------------------------------------------------------------------------------------------------------------------------------|
| renal cortex interstitium                   | UBERON_0005270 |                                                      | chr12:14847029.5G, chr12:14847226.5G, chr12:14854918.1G, chr12:14883768.5G, chr12:14885854.5G                                                                             | chr15:57923529.5G, chr15:58063976.1G, chr15:58064164.5G, chr15:58064657.5G, chr15:58065219.1G                                       |
| renal cortical epithelial cell              | CL_0002584     |                                                      | chr12:14836364.5G, chr12:14847029.5G, chr12:14847226.5G, chr12:14854918.1G                                                                                                |                                                                                                                                     |
| renal pelvis                                | UBERON_0001224 |                                                      | chr12:14847029.5G, chr12:14847226.5G, chr12:14854918.1G, chr12:14883768.5G                                                                                                | chr15:57923529.5G, chr15:58063976.1G, chr15:58064164.5G, chr15:58064657.5G, chr15:58065219.1G                                       |
| retina                                      | UBERON_0000966 |                                                      |                                                                                                                                                                           | chr15:58064164.5G, chr15:58064657.5G, chr15:58065219.1G                                                                             |
| retinal pigment epithelial cell             | CL_0002586     |                                                      | chr12:14836364.5G, chr12:14847029.5G, chr12:14847226.5G, chr12:14854918.1G, chr12:14883768.5G, chr12:14885854.5G                                                          |                                                                                                                                     |
| right atrium auricular region               | UBERON_0006631 |                                                      | chr12:14836364.5G, chr12:14839301.5G, chr12:14840674.5G, chr12:14840920.5G, chr12:14883768.5G, chr12:14885854.5G, chr12:14901082.5G                                       | chr15:57923529.5G, chr15:58063976.1G, chr15:58064164.5G, chr15:58064657.5G, chr15:58065219.1G                                       |
| right cardiac atrium                        | UBERON_0002078 |                                                      |                                                                                                                                                                           |                                                                                                                                     |
| right forelimb                              | UBERON_8300001 |                                                      | chr12:14883768.5G, chr12:14885854.5G                                                                                                                                      | chr15:58065219.1G                                                                                                                   |
| right hindlimb                              | UBERON_8300003 |                                                      | chr12:14883768.5G, chr12:14885854.5G                                                                                                                                      | chr15:57923529.5G, chr15:58065219.1G, chr15:57923529.5G, chr15:58063976.1G, chr15:58064164.5G, chr15:58064657.5G, chr15:58065219.1G |
| right kidney                                | UBERON_0004539 |                                                      | chr12:14847029.5G, chr12:14847226.5G, chr12:14854918.1G, chr12:14883768.5G, chr12:14885854.5G                                                                             | chr15:58064164.5G, chr15:58064657.5G, chr15:58065219.1G                                                                             |
| right lobe of liver                         | UBERON_0001114 |                                                      |                                                                                                                                                                           | chr15:57923529.5G, chr15:58063976.1G, chr15:58064164.5G, chr15:58064657.5G, chr15:58065219.1G                                       |
| right lung                                  | UBERON_0002167 |                                                      | chr12:14847029.5G, chr12:14847226.5G, chr12:14883768.5G, chr12:14885854.5G                                                                                                | chr15:57923529.5G, chr15:58063976.1G, chr15:58064164.5G, chr15:58064657.5G, chr15:58065219.1G                                       |
| right renal cortex interstitium             | UBERON_0018118 |                                                      | chr12:14854918.1G, chr12:14883768.5G                                                                                                                                      | chr15:58064164.5G, chr15:58064657.5G, chr15:58065219.1G                                                                             |
| right renal pelvis                          | UBERON_0018116 |                                                      | chr12:14854918.1G, chr12:14883768.5G                                                                                                                                      | chr15:57923529.5G, chr15:58063976.1G, chr15:58064164.5G, chr15:58064657.5G, chr15:58065219.1G                                       |
| sciatic nerve                               | UBERON_0001322 |                                                      |                                                                                                                                                                           |                                                                                                                                     |
| sigmoid colon                               | UBERON_0001159 |                                                      | chr12:14885854.5G                                                                                                                                                         |                                                                                                                                     |
| skeletal muscle myoblast                    | CL_0000515     |                                                      | chr12:14883768.5G, chr12:14885854.5G                                                                                                                                      | chr15:57923529.5G, chr15:58065219.1G                                                                                                |
| skeletal muscle of trunk                    | UBERON_0001774 |                                                      | chr12:14834162.5G, chr12:14834298.5G, chr12:14836364.5G, chr12:14901082.5G                                                                                                | chr15:57923529.5G, chr15:58064657.5G, chr15:58065219.1G                                                                             |
| skeletal muscle tissue                      | UBERON_0001134 |                                                      | chr12:14847029.5G, chr12:14847226.5G, chr12:14854918.1G, chr12:14883768.5G, chr12:14885854.5G, chr12:14901082.5G                                                          | chr15:57923529.5G, chr15:58064657.5G, chr15:58065219.1G                                                                             |
| skin epidermis                              | UBERON_0001003 |                                                      | chr12:14851053.5G, chr12:14851097.1G, chr12:14854918.1G, chr12:14883768.5G, chr12:14885854.5G, chr12:14901082.5G, chr12:14910656.5G                                       | chr15:58065219.1G                                                                                                                   |
| skin of body                                | UBERON_0002097 |                                                      | chr12:14847029.5G, chr12:14847226.5G, chr12:14854918.1G, chr12:14883768.5G                                                                                                | chr15:57923529.5G, chr15:58063976.1G                                                                                                |
| small intestine                             | UBERON_0002108 | chr4:87868563.5G, chr4:87868643.5G                   | chr12:14836364.5G, chr12:1483768.5G, chr12:14885854.5G, chr12:14911149.1G, chr12:14911328.5G, chr12:14911429.5G                                                           | chr15:58040343.5G, chr15:58040385.5G, chr15:58064657.5G, chr15:58065219.1G                                                          |
| smooth muscle cell                          | CL_0000192     |                                                      |                                                                                                                                                                           |                                                                                                                                     |
| smooth muscle cell of the brain vasculature | CL_0002590     |                                                      | chr12:14836364.5G                                                                                                                                                         | chr15:57923529.5G                                                                                                                   |
| spinal cord                                 | UBERON_0002240 |                                                      | chr12:14834162.5G, chr12:14834298.5G, chr12:14847029.5G, chr12:14847226.5G, chr12:14883768.5G, chr12:14885854.5G                                                          | chr15:57923529.5G, chr15:58064164.5G, chr15:58064657.5G, chr15:58065219.1G                                                          |
| spleen                                      | UBERON_0002106 |                                                      | chr12:14834162.5G, chr12:14834298.5G, chr12:14836364.5G, chr12:14840674.5G, chr12:14847029.5G, chr12:14847226.5G                                                          | chr15:57923529.5G, chr15:58064657.5G, chr15:58065219.1G                                                                             |
| stomach                                     | UBERON_0000945 | chr4:87885460.5G                                     | chr12:14836364.5G, chr12:14840674.5G, chr12:14840920.5G, chr12:14883768.5G, chr12:14885854.5G                                                                             | chr15:57923529.5G, chr15:58040343.5G, chr15:58040385.5G, chr15:58064164.5G, chr15:58064657.5G, chr15:58065219.1G                    |
| stomach smooth muscle                       | UBERON_0004222 |                                                      | chr12:14883768.5G, chr12:14885854.5G                                                                                                                                      | chr15:58065219.1G                                                                                                                   |
| stromal cell of bone marrow                 | CL_0010001     |                                                      | chr12:14836364.5G, chr12:14854918.1G, chr12:14883768.5G, chr12:14885854.5G                                                                                                | chr15:57923529.5G, chr15:58064657.5G, chr15:58065219.1G                                                                             |
| subcutaneous abdominal adipose tissue       | UBERON_0014455 |                                                      | chr12:14847029.5G, chr12:14847226.5G, chr12:14883768.5G, chr12:14885854.5G, chr12:14901082.5G                                                                             | chr15:57923529.5G, chr15:58064657.5G, chr15:58065219.1G                                                                             |
| substantia nigra                            | UBERON_0002038 |                                                      | chr12:14885854.5G                                                                                                                                                         |                                                                                                                                     |
| superior temporal gyrus                     | UBERON_0002769 |                                                      | chr12:14883768.5G                                                                                                                                                         |                                                                                                                                     |
| suppressor macrophage                       | CL_0000862     |                                                      | chr12:14836364.5G                                                                                                                                                         | chr15:58065219.1G                                                                                                                   |
| suprapubic skin                             | UBERON_0036149 |                                                      | chr12:14847029.5G, chr12:14847226.5G, chr12:14851053.5G, chr12:14851097.1G, chr12:14883768.5G, chr12:14885854.5G, chr12:14901082.5G, chr12:14910656.5G                    | chr15:57923529.5G, chr15:58064657.5G, chr15:58065219.1G                                                                             |
| testis                                      | UBERON_0004473 |                                                      | chr12:14847029.5G, chr12:14847226.5G, chr12:14883768.5G, chr12:14885854.5G                                                                                                | chr15:57923529.5G, chr15:58064657.5G, chr15:58065219.1G                                                                             |
| T-helper 1 cell                             | CL_0000545     |                                                      | chr12:14885854.5G                                                                                                                                                         |                                                                                                                                     |
| T-helper 17 cell                            | CL_0000899     |                                                      | chr12:14910656.5G                                                                                                                                                         |                                                                                                                                     |
| T-helper 2 cell                             | CL_0000546     |                                                      | chr12:14910656.5G                                                                                                                                                         | chr15:58065219.1G                                                                                                                   |
| thoracic aorta                              | UBERON_0001515 |                                                      | chr12:14840674.5G, chr12:14840920.5G, chr12:14847029.5G, chr12:14847226.5G, chr12:14883768.5G, chr12:14885854.5G                                                          | chr15:57923529.5G, chr15:58065219.1G                                                                                                |
| thymus                                      | UBERON_0002370 |                                                      |                                                                                                                                                                           | chr15:58064657.5G, chr15:58065219.1G                                                                                                |
| thyroid gland                               | UBERON_0002046 |                                                      | chr12:14847029.5G, chr12:14847226.5G, chr12:14851053.5G, chr12:14851097.1G, chr12:14854918.1G, chr12:14885854.5G                                                          | chr15:57923529.5G                                                                                                                   |
| tibial artery                               | UBERON_0007610 |                                                      | chr12:14885854.5G                                                                                                                                                         |                                                                                                                                     |
| tibial nerve                                | UBERON_0001323 |                                                      | chr12:14836364.5G, chr12:14883768.5G, chr12:14885854.5G, chr12:14901082.5G                                                                                                | chr15:57923529.5G                                                                                                                   |
| tongue                                      | UBERON_0001723 |                                                      | chr12:14883768.5G, chr12:14885854.5G                                                                                                                                      | chr15:57923529.5G, chr15:58064657.5G, chr15:58065219.1G                                                                             |
| transverse colon                            | UBERON_0001157 |                                                      | chr12:14885854.5G, chr12:14911149.1G, chr12:14911328.5G, chr12:14911429.5G                                                                                                |                                                                                                                                     |
| trophoblast                                 | UBERON_0000088 |                                                      | chr12:14836364.5G, chr12:14840674.5G, chr12:14840920.5G, chr12:14851053.5G, chr12:14851097.1G, chr12:14910656.5G, chr12:14911149.1G, chr12:14911328.5G, chr12:14911429.5G |                                                                                                                                     |
| trophoblast cell                            | CL_0000351     | chr4:87868563.5G, chr4:87868643.5G, chr4:87885460.5G | chr12:14836364.5G, chr12:14840674.5G, chr12:14840920.5G, chr12:14851053.5G, chr12:14851097.1G                                                                             | chr15:57923529.5G                                                                                                                   |
| umbilical cord                              | UBERON_0002331 |                                                      | chr12:14883768.5G, chr12:14885854.5G, chr12:14899824.5G                                                                                                                   | chr15:57923529.5G                                                                                                                   |
| upper lobe of left lung                     | UBERON_0008952 |                                                      | chr12:14899901.5G, chr12:14900018.5G                                                                                                                                      |                                                                                                                                     |
| ureter                                      | UBERON_0000556 |                                                      | chr12:14885854.5G                                                                                                                                                         | chr15:58065219.1G                                                                                                                   |
| urinary bladder                             | UBERON_0001255 | chr4:87885460.5G                                     | chr12:14847029.5G, chr12:14847226.5G, chr12:14883768.5G, chr12:14885854.5G, chr12:14901082.5G                                                                             | chr15:57923529.5G, chr15:58063976.1G, chr15:58064164.5G, chr15:58064657.5G, chr15:58065219.1G                                       |
| uterus                                      | UBERON_0000995 |                                                      | chr12:14847029.5G, chr12:14847226.5G, chr12:14854918.1G, chr12:14883768.5G, chr12:14885854.5G, chr12:14901082.5G                                                          | chr15:58064164.5G, chr15:58064657.5G, chr15:58065219.1G                                                                             |
| vagina                                      | UBERON_0000996 |                                                      | chr12:14885854.5G                                                                                                                                                         |                                                                                                                                     |

The variants are shown by their position in Build38, with 5G ending for SNPs and IG for indels

Supplementary Table 6. Co-localisation of EHOA variants and expression of genes at the EHOA loci (eQTL)

| EHOA variants | chr:pos(hg38)  | EA / OA | Freq% EA | OR   | Gene    | Tissue               | eQTL variant | r <sup>2</sup> | EA / OA | Freq% EA | Effect | P value  | Source   | # individuals/tissue | COLOC PP3 | COLOC PP4 |
|---------------|----------------|---------|----------|------|---------|----------------------|--------------|----------------|---------|----------|--------|----------|----------|----------------------|-----------|-----------|
| rs17013495    | chr4:87885460  | T/C     | 59.6     | 1.4  | SPP1    | Spleen               | rs4693198    | 0.91           | C/T     | 59.6     | -0.48  | 1.1E-09  | GTEEx v8 | 227                  | 0.12      | 0.88      |
|               |                |         |          |      |         | Esophagus – Mucosa   | rs4693897    | 0.91           | G/T     | 59.5     | -0.32  | 1.4E-08  | GTEEx v8 | 497                  | 1.00      | 0.00      |
|               |                |         |          |      |         | Whole blood          | rs12644436   | 0.91           | G/A     | 59.4     | -0.18  | 9.0E-09  | GTEEx v8 | 670                  | 1.00      | 0.00      |
| rs1800801     | chr12:14885854 | T/C     | 37.2     | 1.37 | MGP     | Lung                 | rs11614330   | 0.98           | T/C     | 36.9     | -0.19  | 5.9E-13  | GTEEx v8 | 515                  | 0.09      | 0.91      |
|               |                |         |          |      |         | Thyroid              | rs4581512    | 0.95           | T/G     | 37.4     | -0.17  | 3.1E-08  | GTEEx v8 | 574                  | 0.05      | 0.95      |
|               |                |         |          |      |         | Adipose              | rs9668569    | 0.91           | T/C     | 37.2     | -0.53  | 2.8E-22  | deCODE   | 770                  | 0.08      | 0.92      |
|               |                |         |          |      |         | Blood*               | rs11056199   | 0.89           | C/A     | 39.9     | 0.40   | 6.9E-226 | deCODE   | 17,940               | 1.00      | 0.00      |
| rs11631127    | chr15:57977811 | C/G     | 57.6     | 1.46 | ALDH1A2 | Cultured fibroblasts | rs3742961    | 0.93           | C/T     | 60.2     | -0.30  | 9.0E-11  | GTEEx v8 | 483                  | 0.14      | 0.86      |

Data is shown for datasets in GTEEx and deCODE genetics. For each variant the gene whose expression is correlated with the erosive variants is shown (Gene), the tissue (Tissue), the top expression variant (eQTL variant), the correlation between the top expression variant and the erosive variant (r<sup>2</sup>), the effect allele (EA) and the other allele (OA) of the variants, the frequency of their effect allele (Freq% EA), the effect on transcription in standard deviation (Effect), the P value of the expression correlation, the source of data (Source), and the number of individuals in each analysis (# individuals/tissue). The position of the erosive variants are shown in build 38, and the OR of the association with erosive osteoarthritis. PP3 is the posterior probability for two independent signals, and PP4 is the posterior probability for one shared signals using COLOC (Giambartolomei et al, PLoS genetics. 2014;10(5):e1004383)

\* The expression of MGP in blood is very low but the direction of effect is consistent with that reported by den Hollander, W. et al, 2017.



**Supplementary Table 7. Co-localisation of the EHOA associated variants and levels of proteins in plasma (cis-pQTL)**

| Erosive variants | chr:pos(hg38)  | EA / OA | Freq% EA | OR    | Gene | Protein            | pQTL variant | r <sup>2</sup> | EA / OA | Freq% EA | Effect | P value  | COLOC PP3 | COLOC PP4 | Comment                                                                                                                                                        |
|------------------|----------------|---------|----------|-------|------|--------------------|--------------|----------------|---------|----------|--------|----------|-----------|-----------|----------------------------------------------------------------------------------------------------------------------------------------------------------------|
| rs17013495       | chr4:87885460  | T/C     | 59.6     | 1.396 | SPP1 | Osteopontin        | rs990862     | 0.80           | T/C     | 65.9     | -0.063 | 1.8E-13  | 1.00      | 0.00      | Five independent cis-signals for SPP1, and 2 independent trans signals. Rs990862 explains 5% of the variance explained by the pQTLs                            |
| rs1800801        | chr12:14885854 | T/C     | 37.2     | 1.37  | MGP  | Matrix Gla Protein | rs7294636    | 0.99           | A/G     | 37.4     | -0.250 | 8.3E-111 | 0.12      | 0.88      | Two independent cis-signals for the MGP protein (in opposite directions), and 6 trans signals. Rs12307494 explains 72% of the variance explained by the pQTLs. |

Data is based on proteins measured in plasma from 35,339 in Iceland (deCODE genetics) using the Somalogic platform. The top variant that correlates with the levels of the protein (Protein) and its encoding gene (Gene) in plasma (pQTL variant) is shown, and the correlation between the top pQTL variant and the erosive variant (r<sup>2</sup>), the effect allele (EA) and the other allele (OA) of the variants, the frequency of their effect allele (Freq% EA), the effect on protein levels in standard deviation (Effect), and the P value of the protein level-variant correlation. The position of the erosive variants are shown in build 38 (chr:pos(hg38)), and the odds ratio (OR) of the association with erosive osteoarthritis. PP3 is the posterior probability for two independent signals, and PP4 is the posterior probability for one shared signals using COLOC (Giambartolomei et al, PLoS genetics. 2014;10(5):e1004383)

**Supplementary Table 8. Lead sequence variants for two of the four EHOA signals, or their correlated variants, reside within enhancer elements that are predicted to affect nearby genes in different tissue/cell types based on EpiMap (<http://compbio.mit.edu/epimap/>).**

| Tissue / cell type                   | rs1800801                                                                                                                                                                                                                                                                                                                                                                                                                                                                                                                                                   | rs11631127                                                                                                 |
|--------------------------------------|-------------------------------------------------------------------------------------------------------------------------------------------------------------------------------------------------------------------------------------------------------------------------------------------------------------------------------------------------------------------------------------------------------------------------------------------------------------------------------------------------------------------------------------------------------------|------------------------------------------------------------------------------------------------------------|
|                                      | (chr12:14885854)                                                                                                                                                                                                                                                                                                                                                                                                                                                                                                                                            | (chr15:57977811)                                                                                           |
| ACUTE_LYMPHOBLASTIC_LEUKEMIA         | MGP (chr12:14854918:IG, chr12:14879684:SG, chr12:14879827:SG, chr12:14879925:IG, chr12:14879926:SG, chr12:14901082:SG)                                                                                                                                                                                                                                                                                                                                                                                                                                      |                                                                                                            |
| ACUTE_PROMYELOCYTIC_LEUKEMIA         | MGP (chr12:14854918:IG)                                                                                                                                                                                                                                                                                                                                                                                                                                                                                                                                     |                                                                                                            |
| ADENOID_CYSTIC_CARINOMA              | ART4 (chr12:14835521:SG, chr12:14840136:SG, chr12:14840214:SG, chr12:14840505:SG, chr12:14840674:SG, chr12:14840920:SG), MGP (chr12:14854918:IG)                                                                                                                                                                                                                                                                                                                                                                                                            |                                                                                                            |
| ADIPOCYTE                            | ART4 (chr12:14835521:SG, chr12:14840136:SG, chr12:14840214:SG, chr12:14840505:SG, chr12:14840674:SG, chr12:14840920:SG), MGP (chr12:14854918:IG)                                                                                                                                                                                                                                                                                                                                                                                                            |                                                                                                            |
| ADIPOCYTE_FROM_MSC                   | ART4 (chr12:14835521:SG, chr12:14840136:SG, chr12:14840214:SG, chr12:14840505:SG, chr12:14840674:SG, chr12:14840920:SG), MGP (chr12:14847029:SG), MGP (chr12:14847029:SG, chr12:14854918:IG, chr12:14894016:SG, chr12:14897475:SG, chr12:14897803:SG, chr12:14901082:SG)                                                                                                                                                                                                                                                                                    |                                                                                                            |
| ADIPOSE_TISSUE                       | ART4 (chr12:14835521:SG, chr12:14840136:SG, chr12:14840214:SG, chr12:14840505:SG, chr12:14840674:SG, chr12:14840920:SG, chr12:14847029:SG), MGP (chr12:14847029:SG, chr12:14854918:IG, chr12:14879684:SG, chr12:14879827:SG, chr12:14879925:IG, chr12:14879926:SG, chr12:14894016:SG, chr12:14901082:SG)                                                                                                                                                                                                                                                    |                                                                                                            |
| ADRENAL_GLAND                        | ART4 (chr12:14835521:SG, chr12:14840136:SG, chr12:14840214:SG, chr12:14840505:SG, chr12:14840674:SG, chr12:14840920:SG, chr12:14847029:SG), MGP (chr12:14847029:SG, chr12:14894016:SG, chr12:14897475:SG, chr12:14897803:SG, chr12:14901082:SG), WBP11 (chr12:14847029:SG, chr12:14894016:SG)                                                                                                                                                                                                                                                               | ALDH1A2 (chr15:58061348:SG)                                                                                |
| AMMONS_HORN                          | ART4 (chr12:14840136:SG, chr12:14840214:SG, chr12:14840505:SG, chr12:14840674:SG, chr12:14840920:SG), MGP (chr12:14894016:SG)                                                                                                                                                                                                                                                                                                                                                                                                                               |                                                                                                            |
| AMNION                               | ART4 (chr12:14835521:SG, chr12:14840136:SG, chr12:14840214:SG, chr12:14840505:SG, chr12:14840674:SG, chr12:14840920:SG, chr12:14851053:SG, chr12:14851097:IG), WBP11 (chr12:14844512:SG)                                                                                                                                                                                                                                                                                                                                                                    |                                                                                                            |
| AMNION_EPITHELIAL_CELL               | ART4 (chr12:14835521:SG)                                                                                                                                                                                                                                                                                                                                                                                                                                                                                                                                    |                                                                                                            |
| AMNION_STEM_CELL                     | ART4 (chr12:14840136:SG, chr12:14840214:SG, chr12:14840505:SG, chr12:14840674:SG, chr12:14840920:SG)                                                                                                                                                                                                                                                                                                                                                                                                                                                        |                                                                                                            |
| AMNIOTIC_FLUID_FROM_MSC              | MGP (chr12:14854918:IG)                                                                                                                                                                                                                                                                                                                                                                                                                                                                                                                                     |                                                                                                            |
| ANGULAR_CYRUS                        | ART4 (chr12:14835521:SG), MGP (chr12:14894016:SG)                                                                                                                                                                                                                                                                                                                                                                                                                                                                                                           |                                                                                                            |
| AORTA                                | ART4 (chr12:14835521:SG, chr12:14840136:SG, chr12:14840214:SG, chr12:14840505:SG, chr12:14840674:SG, chr12:14840920:SG), MGP (chr12:14840136:SG, chr12:14840214:SG, chr12:14840505:SG, chr12:14840674:SG, chr12:14840920:SG, chr12:14854918:IG, chr12:14879684:SG, chr12:14879827:SG, chr12:14879925:IG, chr12:14879926:SG, chr12:14894016:SG, chr12:14899824:SG, chr12:14899901:SG, chr12:14900018:SG, chr12:14901082:SG)                                                                                                                                  |                                                                                                            |
| AORTA_FIBROBLAST                     | ART4 (chr12:14835521:SG, chr12:14840136:SG, chr12:14840214:SG, chr12:14840505:SG, chr12:14840674:SG, chr12:14840920:SG), MGP (chr12:14854918:IG, chr12:14894016:SG)                                                                                                                                                                                                                                                                                                                                                                                         |                                                                                                            |
| ARM_MUSCLE                           | ART4 (chr12:14840136:SG, chr12:14840214:SG, chr12:14840505:SG, chr12:14840674:SG, chr12:14840920:SG, chr12:14847029:SG), MGP (chr12:14847029:SG, chr12:14854918:IG, chr12:14894016:SG, chr12:14897475:SG, chr12:14897803:SG), WBP11 (chr12:14894016:SG)                                                                                                                                                                                                                                                                                                     |                                                                                                            |
| ASCENDING_AORTA                      | ART4 (chr12:14840136:SG, chr12:14840214:SG, chr12:14840505:SG, chr12:14840674:SG, chr12:14840920:SG, chr12:14844512:SG), WBP11 (chr12:14844512:SG, chr12:14890950:SG, chr12:14890963:SG), MGP (chr12:14844512:SG, chr12:14847029:SG, chr12:14854918:IG, chr12:14879684:SG, chr12:14879827:SG, chr12:14879925:IG, chr12:14879926:SG, chr12:14890950:SG, chr12:14890963:SG, chr12:14894016:SG, chr12:14897475:SG, chr12:14897803:SG, chr12:14901082:SG)                                                                                                       |                                                                                                            |
| ASTROCYTE                            | ART4 (chr12:14835521:SG, chr12:14847029:SG), MGP (chr12:14847029:SG)                                                                                                                                                                                                                                                                                                                                                                                                                                                                                        |                                                                                                            |
| ASTROCYTE_HIPPOCAMPUS                | ART4 (chr12:14835521:SG, chr12:14840136:SG, chr12:14840214:SG, chr12:14840505:SG, chr12:14840674:SG, chr12:14840920:SG, chr12:14847029:SG), MGP (chr12:14847029:SG)                                                                                                                                                                                                                                                                                                                                                                                         |                                                                                                            |
| ASTROCYTE_SPINAL_CORD                | MGP (chr12:14854918:IG)                                                                                                                                                                                                                                                                                                                                                                                                                                                                                                                                     |                                                                                                            |
| B_CELL                               | ART4 (chr12:14840136:SG, chr12:14840214:SG, chr12:14840505:SG, chr12:14840674:SG, chr12:14840920:SG, chr12:14847029:SG), MGP (chr12:14847029:SG, chr12:14854918:IG, chr12:14894016:SG)                                                                                                                                                                                                                                                                                                                                                                      | ALDH1A2 (chr15:58061348:SG)                                                                                |
| B_CELL_LYMPHOMA                      | ART4 (chr12:14835521:SG, chr12:14851053:SG, chr12:14851097:IG), MGP (chr12:14854918:IG, chr12:14878220:SG, chr12:14879684:SG, chr12:14879827:SG, chr12:14879925:IG, chr12:14879926:SG, chr12:14894016:SG, chr12:14899824:SG, chr12:14899901:SG, chr12:14900018:SG, chr12:14901082:SG)                                                                                                                                                                                                                                                                       |                                                                                                            |
| BACK_MUSCLE                          | ART4 (chr12:14840136:SG, chr12:14840214:SG, chr12:14840505:SG, chr12:14840674:SG, chr12:14840920:SG, chr12:14847029:SG), MGP (chr12:14847029:SG, chr12:14854918:IG, chr12:14894016:SG, chr12:14897475:SG, chr12:14897803:SG), WBP11 (chr12:14894016:SG)                                                                                                                                                                                                                                                                                                     |                                                                                                            |
| BODY_OF_PANCREAS                     | ART4 (chr12:14840136:SG, chr12:14840214:SG, chr12:14840505:SG, chr12:14840674:SG, chr12:14840920:SG, chr12:14847029:SG), WBP11 (chr12:14847029:SG, chr12:14894016:SG), MGP (chr12:14847029:SG, chr12:14894016:SG)                                                                                                                                                                                                                                                                                                                                           |                                                                                                            |
| BONE_ARM                             | ART4 (chr12:14840136:SG, chr12:14840214:SG, chr12:14840505:SG, chr12:14840674:SG, chr12:14840920:SG), MGP (chr12:14894016:SG)                                                                                                                                                                                                                                                                                                                                                                                                                               |                                                                                                            |
| BONE_FEMUR                           | ART4 (chr12:14840136:SG, chr12:14840214:SG, chr12:14840505:SG, chr12:14840674:SG, chr12:14840920:SG), MGP (chr12:14894016:SG)                                                                                                                                                                                                                                                                                                                                                                                                                               |                                                                                                            |
| BONE_LEG                             | ART4 (chr12:14840136:SG, chr12:14840214:SG, chr12:14840505:SG, chr12:14840674:SG, chr12:14840920:SG), MGP (chr12:14894016:SG)                                                                                                                                                                                                                                                                                                                                                                                                                               |                                                                                                            |
| BONE_MARROW_EPITHELIAL_CELL          | ART4 (chr12:14835521:SG, chr12:14840136:SG, chr12:14840214:SG, chr12:14840505:SG, chr12:14840674:SG, chr12:14840920:SG)                                                                                                                                                                                                                                                                                                                                                                                                                                     |                                                                                                            |
| BONE_MARROW_STROMA                   | ART4 (chr12:14840136:SG, chr12:14840214:SG, chr12:14840505:SG, chr12:14840674:SG, chr12:14840920:SG)                                                                                                                                                                                                                                                                                                                                                                                                                                                        |                                                                                                            |
| BONE_MARROW_STROMA_CELL              | ART4 (chr12:14840136:SG, chr12:14840214:SG, chr12:14840505:SG, chr12:14840674:SG, chr12:14840920:SG), MGP (chr12:14854918:IG, chr12:14894016:SG), WBP11 (chr12:14894016:SG)                                                                                                                                                                                                                                                                                                                                                                                 |                                                                                                            |
| BRAIN                                | MGP (chr12:14894016:SG, chr12:14897475:SG, chr12:14897803:SG)                                                                                                                                                                                                                                                                                                                                                                                                                                                                                               |                                                                                                            |
| BRAIN_MICROVASCULAR_ENDOTHELIAL_CELL | MGP (chr12:14854918:IG)                                                                                                                                                                                                                                                                                                                                                                                                                                                                                                                                     |                                                                                                            |
| BRAIN_VASCULATURE_SMOOTH_MUSCLE_CELL | MGP (chr12:14894016:SG)                                                                                                                                                                                                                                                                                                                                                                                                                                                                                                                                     |                                                                                                            |
| BREAST_EPITHELIAL_CELL               | ART4 (chr12:14840136:SG, chr12:14840214:SG, chr12:14840505:SG, chr12:14840674:SG, chr12:14840920:SG), MGP (chr12:14840136:SG, chr12:14840214:SG, chr12:14840505:SG, chr12:14840674:SG, chr12:14840920:SG), GUCY2C (chr12:14911328:SG)                                                                                                                                                                                                                                                                                                                       |                                                                                                            |
| BREAST_EPITHELIUM                    | ART4 (chr12:14840136:SG, chr12:14840214:SG, chr12:14840505:SG, chr12:14840674:SG, chr12:14840920:SG, chr12:14851053:SG, chr12:14851097:IG), MGP (chr12:14840136:SG, chr12:14840214:SG, chr12:14840505:SG, chr12:14840674:SG, chr12:14840920:SG, chr12:14854918:IG, chr12:14879684:SG, chr12:14879827:SG, chr12:14879925:IG, chr12:14879926:SG, chr12:14890950:SG, chr12:14890963:SG, chr12:14894016:SG, chr12:14901082:SG), H2A1 (chr12:14840136:SG, chr12:14840214:SG, chr12:14840505:SG, chr12:14840674:SG, chr12:14840920:SG), WBP11 (chr12:14894016:SG) |                                                                                                            |
| BREAST_FIBROBLAST                    | ART4 (chr12:14847029:SG), MGP (chr12:14847029:SG, chr12:14894016:SG, chr12:14897475:SG, chr12:14897803:SG)                                                                                                                                                                                                                                                                                                                                                                                                                                                  |                                                                                                            |
| BRONCHIAL_EPITHELIAL_CELL            | ART4 (chr12:14835521:SG, chr12:14840136:SG, chr12:14840214:SG, chr12:14840505:SG, chr12:14840674:SG, chr12:14840920:SG)                                                                                                                                                                                                                                                                                                                                                                                                                                     |                                                                                                            |
| BURKITT_LYMPHOMA                     | MGP (chr12:14854918:IG), WBP11 (chr12:14854918:IG)                                                                                                                                                                                                                                                                                                                                                                                                                                                                                                          |                                                                                                            |
| CARDIAC_FIBROBLAST                   | ART4 (chr12:14835521:SG, chr12:14840136:SG, chr12:14840214:SG, chr12:14840505:SG, chr12:14840674:SG, chr12:14840920:SG, chr12:14847029:SG), MGP (chr12:14847029:SG, chr12:14854918:IG, chr12:14894016:SG, chr12:14897475:SG, chr12:14897803:SG)                                                                                                                                                                                                                                                                                                             |                                                                                                            |
| CARDIAC_MUSCLE_DERIV                 | ART4 (chr12:14835521:SG)                                                                                                                                                                                                                                                                                                                                                                                                                                                                                                                                    |                                                                                                            |
| CARDIAC_MYOCYTE                      | ART4 (chr12:14840136:SG, chr12:14840214:SG, chr12:14840505:SG, chr12:14840674:SG, chr12:14840920:SG), MGP (chr12:14854918:IG, chr12:14894016:SG)                                                                                                                                                                                                                                                                                                                                                                                                            |                                                                                                            |
| CAUDATE_NUCLEUS                      | ART4 (chr12:14835521:SG), MGP (chr12:14879684:SG, chr12:14879827:SG, chr12:14879925:IG, chr12:14879926:SG, chr12:14894016:SG), WBP11 (chr12:14894016:SG)                                                                                                                                                                                                                                                                                                                                                                                                    |                                                                                                            |
| CD34_CMP                             | ART4 (chr12:14835521:SG), MGP (chr12:14854918:IG), GUCY2C (chr12:14911328:SG)                                                                                                                                                                                                                                                                                                                                                                                                                                                                               |                                                                                                            |
| CD4_T_CELL                           | ERP27 (chr12:14911328:SG)                                                                                                                                                                                                                                                                                                                                                                                                                                                                                                                                   | ALDH1A2 (chr15:58061348:SG)                                                                                |
| CD8_T_CELL                           |                                                                                                                                                                                                                                                                                                                                                                                                                                                                                                                                                             | CGN11 (chr15:58061348:SG), ALDH1A2 (chr15:58061348:SG), GCOM1 (chr15:58061348:SG), UPC (chr15:58061348:SG) |
| CEREBELLAR_CORTEX                    | MGP (chr12:14897475:SG, chr12:14897803:SG)                                                                                                                                                                                                                                                                                                                                                                                                                                                                                                                  |                                                                                                            |
| CEREBELLUM                           | ART4 (chr12:14840136:SG, chr12:14840214:SG, chr12:14840505:SG, chr12:14840674:SG, chr12:14840920:SG), MGP (chr12:14894016:SG)                                                                                                                                                                                                                                                                                                                                                                                                                               |                                                                                                            |
| CERVIX_ADENOCARCINOMA                | ART4 (chr12:14835521:SG, chr12:14840136:SG, chr12:14840214:SG, chr12:14840505:SG, chr12:14840674:SG, chr12:14840920:SG)                                                                                                                                                                                                                                                                                                                                                                                                                                     |                                                                                                            |

|                                          |                                                                                                                                                                                                                                                                                                                                                                                                                                                                                                                                                                                                            |
|------------------------------------------|------------------------------------------------------------------------------------------------------------------------------------------------------------------------------------------------------------------------------------------------------------------------------------------------------------------------------------------------------------------------------------------------------------------------------------------------------------------------------------------------------------------------------------------------------------------------------------------------------------|
| CHORION                                  | ART4 (chr12:14835521-SG, chr12:14840136-SG, chr12:14840214-SG, chr12:14840505-SG, chr12:14840674-SG, chr12:14840920-SG), chr12:14844512-SG, chr12:14847029-SG, chr12:14851053-SG, chr12:14851097-IG, MGP (chr12:14840136-SG, chr12:14840214-SG, chr12:14840505-SG, chr12:14840674-SG, chr12:14840920-SG), chr12:14847029-SG, chr12:14854918-IG, chr12:14901082-SG), ERP27 (chr12:14840136-SG, chr12:14840214-SG, chr12:14840505-SG, chr12:14840674-SG, chr12:14840920-SG), H2AJ (chr12:14840136-SG, chr12:14840214-SG, chr12:14840505-SG, chr12:14840674-SG, chr12:14840920-SG), WBP11 (chr12:14847029-SG) |
| CHORIONIC_VILLUS                         | ART4 (chr12:14835521-SG, chr12:14840136-SG, chr12:14840214-SG, chr12:14840505-SG, chr12:14840674-SG, chr12:14840920-SG), ERP27 (chr12:14840920-SG)                                                                                                                                                                                                                                                                                                                                                                                                                                                         |
| CHOROID_PLEXUS_EPITHELIAL_CELL           | ART4 (chr12:14840136-SG, chr12:14840214-SG, chr12:14840505-SG, chr12:14840674-SG, chr12:14840920-SG), MGP (chr12:14854918-IG)                                                                                                                                                                                                                                                                                                                                                                                                                                                                              |
| CINGULATE_GYRUS                          | ART4 (chr12:14835521-SG), MGP (chr12:14894016-SG), WBP11 (chr12:14894016-SG)                                                                                                                                                                                                                                                                                                                                                                                                                                                                                                                               |
| COLON_CARCINOMA                          | ART4 (chr12:14835521-SG, chr12:14840136-SG, chr12:14840214-SG, chr12:14840505-SG, chr12:14840674-SG, chr12:14840920-SG), MGP (chr12:14840136-SG, chr12:14840214-SG, chr12:14840505-SG, chr12:14840674-SG, chr12:14840920-SG)                                                                                                                                                                                                                                                                                                                                                                               |
| COLON_EPITHELIAL_CELL                    | ART4 (chr12:14840136-SG, chr12:14840214-SG, chr12:14840505-SG, chr12:14840674-SG, chr12:14840920-SG), MGP (chr12:14854918-IG)                                                                                                                                                                                                                                                                                                                                                                                                                                                                              |
| COLON_MUCOSA                             | ART4 (chr12:14840136-SG, chr12:14840214-SG, chr12:14840505-SG, chr12:14840674-SG, chr12:14840920-SG), WBP11 (chr12:14894016-SG), MGP (chr12:14894016-SG)                                                                                                                                                                                                                                                                                                                                                                                                                                                   |
| COLON_MUSCLE                             | ART4 (chr12:14840136-SG, chr12:14840214-SG, chr12:14840505-SG, chr12:14840674-SG, chr12:14840920-SG, chr12:14847029-SG), MGP (chr12:14847029-SG, chr12:14854918-IG, chr12:14894016-SG), WBP11 (chr12:14894016-SG)                                                                                                                                                                                                                                                                                                                                                                                          |
| COLORECTAL_ADENOCARCINOMA                | ART4 (chr12:14835521-SG, chr12:14840136-SG, chr12:14840214-SG, chr12:14840505-SG, chr12:14840674-SG, chr12:14840920-SG)                                                                                                                                                                                                                                                                                                                                                                                                                                                                                    |
| CONJUNCTIVA_FIBROBLAST                   | ART4 (chr12:14840136-SG, chr12:14840214-SG, chr12:14840505-SG, chr12:14840674-SG, chr12:14840920-SG), MGP (chr12:14854918-IG, chr12:14894016-SG)                                                                                                                                                                                                                                                                                                                                                                                                                                                           |
| CORONARY_ARTERY                          | ART4 (chr12:14835521-SG, chr12:14840136-SG, chr12:14840214-SG, chr12:14840505-SG, chr12:14840674-SG, chr12:14840920-SG, chr12:14844512-SG, chr12:14847029-SG), WBP11 (chr12:14844512-SG), MGP (chr12:14844512-SG, chr12:14847029-SG, chr12:14879684-SG, chr12:14879827-SG, chr12:14879925-IG, chr12:14879926-SG, chr12:14890950-SG, chr12:14890963-SG, chr12:14894016-SG, chr12:14901082-SG)                                                                                                                                                                                                               |
| DERMIS_BLOOD_VESSEL_ENDOTHELIAL_CELL     | ART4 (chr12:14835521-SG, chr12:14840136-SG, chr12:14840214-SG, chr12:14840505-SG, chr12:14840674-SG, chr12:14840920-SG, chr12:14847029-SG), MGP (chr12:14840136-SG, chr12:14840214-SG, chr12:14840505-SG, chr12:14840674-SG, chr12:14840920-SG), GUCY2C (chr12:14911328-SG)                                                                                                                                                                                                                                                                                                                                |
| DERMIS_FIBROBLAST                        | ART4 (chr12:14835521-SG, chr12:14840136-SG, chr12:14840214-SG, chr12:14840505-SG, chr12:14840674-SG, chr12:14840920-SG), MGP (chr12:14854918-IG, chr12:14894016-SG, chr12:14901082-SG)                                                                                                                                                                                                                                                                                                                                                                                                                     |
| DERMIS_LYMPHATIC_VESSEL_ENDOTHELIAL_CELL | ART4 (chr12:14835521-SG, chr12:14840136-SG, chr12:14840214-SG, chr12:14840505-SG, chr12:14840674-SG, chr12:14840920-SG, chr12:14847029-SG), MGP (chr12:14847029-SG, chr12:14894016-SG), WBP11 (chr12:14894016-SG)                                                                                                                                                                                                                                                                                                                                                                                          |
| DESMOPLASTIC_MEDULLOBLASTOMA             | ART4 (chr12:14835521-SG, chr12:14840136-SG, chr12:14840214-SG, chr12:14840505-SG, chr12:14840674-SG, chr12:14840920-SG)                                                                                                                                                                                                                                                                                                                                                                                                                                                                                    |
| DUODENUM_MUCOSA                          | ART4 (chr12:14840136-SG, chr12:14840214-SG, chr12:14840505-SG, chr12:14840674-SG, chr12:14840920-SG, chr12:14847029-SG), MGP (chr12:14847029-SG, chr12:14894016-SG)                                                                                                                                                                                                                                                                                                                                                                                                                                        |
| DUODENUM_MUSCLE                          | ART4 (chr12:14835521-SG, chr12:14840136-SG, chr12:14840214-SG, chr12:14840505-SG, chr12:14840674-SG, chr12:14840920-SG), MGP (chr12:14854918-IG, chr12:14879684-SG, chr12:14879827-SG, chr12:14879925-IG, chr12:14879926-SG, chr12:14894016-SG, chr12:14897475-SG, chr12:14897803-SG)                                                                                                                                                                                                                                                                                                                      |
| EMBRYONIC_FACIAL_PROMINENCE              | MGP (chr12:14854918-IG, chr12:14894016-SG)                                                                                                                                                                                                                                                                                                                                                                                                                                                                                                                                                                 |
| ENDOCRINE_PANCREAS                       | ART4 (chr12:14835521-SG, chr12:14840136-SG, chr12:14840214-SG, chr12:14840505-SG, chr12:14840674-SG, chr12:14840920-SG), MGP (chr12:14894016-SG)                                                                                                                                                                                                                                                                                                                                                                                                                                                           |
| ENDODERMAL_DERIV                         | MGP (chr12:14894016-SG)                                                                                                                                                                                                                                                                                                                                                                                                                                                                                                                                                                                    |
| ENDOMETRIAL_ADENOCARCINOMA               | ART4 (chr12:14835521-SG, chr12:14840136-SG, chr12:14840214-SG, chr12:14840505-SG, chr12:14840674-SG, chr12:14840920-SG, chr12:14844512-SG, chr12:14847029-SG), WBP11 (chr12:14844512-SG), MGP (chr12:14847029-SG, chr12:14894016-SG)                                                                                                                                                                                                                                                                                                                                                                       |
| EPIDERMAL_MELANOCYTE                     | ART4 (chr12:14835521-SG, chr12:14840136-SG, chr12:14840214-SG, chr12:14840505-SG, chr12:14840674-SG, chr12:14840920-SG)                                                                                                                                                                                                                                                                                                                                                                                                                                                                                    |
| ESC                                      | ART4 (chr12:14840136-SG, chr12:14840214-SG, chr12:14840505-SG, chr12:14840674-SG, chr12:14840920-SG, chr12:14851053-SG, chr12:14851097-IG), MGP (chr12:14854918-IG)                                                                                                                                                                                                                                                                                                                                                                                                                                        |
| ESOPHAGUS                                | WBP11 (chr12:14894016-SG), MGP (chr12:14894016-SG)                                                                                                                                                                                                                                                                                                                                                                                                                                                                                                                                                         |
| ESOPHAGUS_MUSCULARIS_MUCOSA              | ART4 (chr12:14840136-SG, chr12:14840214-SG, chr12:14840505-SG, chr12:14840674-SG, chr12:14840920-SG), MGP (chr12:14894016-SG, chr12:14901082-SG)                                                                                                                                                                                                                                                                                                                                                                                                                                                           |
| ESOPHAGUS_SQUAMOUS_EPITHELIUM            | ART4 (chr12:14840136-SG, chr12:14840214-SG, chr12:14840505-SG, chr12:14840674-SG, chr12:14840920-SG), MGP (chr12:14890950-SG, chr12:14890963-SG, chr12:14894016-SG, chr12:14901082-SG)                                                                                                                                                                                                                                                                                                                                                                                                                     |
| EYE_RETINOBLASTOMA                       | ART4 (chr12:14835521-SG)                                                                                                                                                                                                                                                                                                                                                                                                                                                                                                                                                                                   |
| FIBROSARCOMA                             | ART4 (chr12:14840136-SG, chr12:14840214-SG, chr12:14840505-SG, chr12:14840674-SG, chr12:14840920-SG)                                                                                                                                                                                                                                                                                                                                                                                                                                                                                                       |
| FORESKIN_FIBROBLAST                      | ART4 (chr12:14835521-SG, chr12:14840136-SG, chr12:14840214-SG, chr12:14840505-SG, chr12:14840674-SG, chr12:14840920-SG), MGP (chr12:14854918-IG)                                                                                                                                                                                                                                                                                                                                                                                                                                                           |
| FORESKIN KERATINOCYTE                    | ART4 (chr12:14840136-SG, chr12:14840214-SG, chr12:14840505-SG, chr12:14840674-SG, chr12:14840920-SG)                                                                                                                                                                                                                                                                                                                                                                                                                                                                                                       |
| FORESKIN_MELANOCYTE                      | ART4 (chr12:14835521-SG, chr12:14851053-SG, chr12:14851097-IG), MGP (chr12:14854918-IG, chr12:14894016-SG)                                                                                                                                                                                                                                                                                                                                                                                                                                                                                                 |
| FRONTAL_CORTEX                           | ART4 (chr12:14835521-SG, chr12:14840136-SG, chr12:14840214-SG, chr12:14840505-SG, chr12:14840674-SG, chr12:14840920-SG)                                                                                                                                                                                                                                                                                                                                                                                                                                                                                    |
| GASTROCNEMIUS_MEDIALIS                   | ART4 (chr12:14835521-SG, chr12:14840136-SG, chr12:14840214-SG, chr12:14840505-SG, chr12:14840674-SG, chr12:14840920-SG, chr12:14847029-SG), MGP (chr12:14847029-SG, chr12:14894016-SG, chr12:14897475-SG, chr12:14897803-SG, chr12:14901082-SG), WBP11 (chr12:14894016-SG)                                                                                                                                                                                                                                                                                                                                 |
| GASTROESOPHAGEAL_SPHINCTER               | ART4 (chr12:14840136-SG, chr12:14840214-SG, chr12:14840505-SG, chr12:14840674-SG, chr12:14840920-SG), MGP (chr12:14894016-SG, chr12:14901082-SG)                                                                                                                                                                                                                                                                                                                                                                                                                                                           |
| GERMINAL_CENTER                          | MGP (chr12:14854918-IG)                                                                                                                                                                                                                                                                                                                                                                                                                                                                                                                                                                                    |
| GERMINAL_MATRIX                          | ART4 (chr12:14835521-SG)                                                                                                                                                                                                                                                                                                                                                                                                                                                                                                                                                                                   |
| GINGIVAL_FIBROBLAST                      | ART4 (chr12:14840136-SG, chr12:14840214-SG, chr12:14840505-SG, chr12:14840674-SG, chr12:14840920-SG), MGP (chr12:14854918-IG)                                                                                                                                                                                                                                                                                                                                                                                                                                                                              |
| GLIOBLASTOMA                             | ART4 (chr12:14840136-SG, chr12:14840214-SG, chr12:14840505-SG, chr12:14840674-SG, chr12:14840920-SG)                                                                                                                                                                                                                                                                                                                                                                                                                                                                                                       |
| GLOBUS_PALLIDUS                          | MGP (chr12:14894016-SG), WBP11 (chr12:14894016-SG)                                                                                                                                                                                                                                                                                                                                                                                                                                                                                                                                                         |
| GLOMERULUS_ENDOTHELIAL_CELL              | ART4 (chr12:14835521-SG, chr12:14840136-SG, chr12:14840214-SG, chr12:14840505-SG, chr12:14840674-SG, chr12:14840920-SG, chr12:14847029-SG), MGP (chr12:14847029-SG)                                                                                                                                                                                                                                                                                                                                                                                                                                        |
| GLOMERULUS_EPITHELIAL_CELL               | ART4 (chr12:14835521-SG, chr12:14840136-SG, chr12:14840214-SG, chr12:14840505-SG, chr12:14840674-SG, chr12:14840920-SG)                                                                                                                                                                                                                                                                                                                                                                                                                                                                                    |
| GLOMERULUS_VISCERAL_EPITHELIAL_CELL      | ART4 (chr12:14835521-SG, chr12:14840136-SG, chr12:14840214-SG, chr12:14840505-SG, chr12:14840674-SG, chr12:14840920-SG)                                                                                                                                                                                                                                                                                                                                                                                                                                                                                    |
| HEART                                    | ART4 (chr12:14835521-SG, chr12:14840136-SG, chr12:14840214-SG, chr12:14840505-SG, chr12:14840674-SG, chr12:14840920-SG, chr12:14847029-SG), MGP (chr12:14840136-SG, chr12:14840214-SG, chr12:14840505-SG, chr12:14840674-SG, chr12:14840920-SG, chr12:14847029-SG, chr12:14878220-SG, chr12:14894016-SG, chr12:14897475-SG, chr12:14897803-SG, chr12:14901082-SG), WBP11 (chr12:14894016-SG)                                                                                                                                                                                                               |
| HEART_LEFT_ATRIUM                        | ART4 (chr12:14835521-SG, chr12:14840136-SG, chr12:14840214-SG, chr12:14840505-SG, chr12:14840674-SG, chr12:14840920-SG), WBP11 (chr12:14844512-SG), MGP (chr12:14878220-SG, chr12:14894016-SG, chr12:14897475-SG, chr12:14897803-SG)                                                                                                                                                                                                                                                                                                                                                                       |
| HEART_LEFT_VENTRICLE                     | ART4 (chr12:14835521-SG, chr12:14840136-SG, chr12:14840214-SG, chr12:14840505-SG, chr12:14840674-SG, chr12:14840920-SG, chr12:14847029-SG), MGP (chr12:14847029-SG, chr12:14894016-SG, chr12:14899824-SG, chr12:14899901-SG, chr12:14900018-SG, chr12:14901082-SG), WBP11 (chr12:14894016-SG, chr12:14901082-SG)                                                                                                                                                                                                                                                                                           |
| HEART_RIGHT_ATRIUM                       | ART4 (chr12:14835521-SG, chr12:14840136-SG, chr12:14840214-SG, chr12:14840505-SG, chr12:14840674-SG, chr12:14840920-SG, chr12:14847029-SG), WBP11 (chr12:14844512-SG), MGP (chr12:14879925-IG, chr12:14879926-SG, chr12:14890950-SG, chr12:14890963-SG, chr12:14894016-SG, chr12:14899824-SG, chr12:14899901-SG, chr12:14900018-SG, chr12:14901082-SG)                                                                                                                                                                                                                                                     |

|                                     |                                                                                                                                                                                                                                                                                                                                                                                                                                                                                                                                                                     |                                                                                    |
|-------------------------------------|---------------------------------------------------------------------------------------------------------------------------------------------------------------------------------------------------------------------------------------------------------------------------------------------------------------------------------------------------------------------------------------------------------------------------------------------------------------------------------------------------------------------------------------------------------------------|------------------------------------------------------------------------------------|
| HEART_RIGHT_VENTRICLE               | ART4 (chr12:14835521:SG, chr12:14840136:SG, chr12:14840214:SG, chr12:14840505:SG, chr12:14840674:SG, chr12:14840920:SG), MGP (chr12:14879684:SG, chr12:14879827:SG, chr12:14879925:IG, chr12:14879926:SG, chr12:14894016:SG, chr12:14901082:SG)                                                                                                                                                                                                                                                                                                                     |                                                                                    |
| HEPATIC_STELLATE_CELL               | ART4 (chr12:14835521:SG, chr12:14840136:SG, chr12:14840214:SG, chr12:14840505:SG, chr12:14840674:SG, chr12:14840920:SG)                                                                                                                                                                                                                                                                                                                                                                                                                                             |                                                                                    |
| HEPATOCELLULAR_CARCINOMA            | ART4 (chr12:14835521:SG, chr12:14840136:SG, chr12:14840214:SG, chr12:14840505:SG, chr12:14840674:SG, chr12:14840920:SG), MGP (chr12:14847029:SG, chr12:14844512:SG, chr12:14847029:SG, chr12:14851053:SG, chr12:14851097:IG), MGP (chr12:14847029:SG)                                                                                                                                                                                                                                                                                                               |                                                                                    |
| HEPATOCTYE_DERIV                    | ART4 (chr12:14835521:SG, chr12:14840136:SG, chr12:14840214:SG, chr12:14840505:SG, chr12:14840674:SG, chr12:14840920:SG), MGP (chr12:14854918:IG, chr12:14894016:SG)                                                                                                                                                                                                                                                                                                                                                                                                 |                                                                                    |
| HIPPOCAMPUS                         | ART4 (chr12:14835521:SG), MGP (chr12:14894016:SG)                                                                                                                                                                                                                                                                                                                                                                                                                                                                                                                   |                                                                                    |
| INFERIOR_PARIETAL_CORTEX            | MGP (chr12:14894016:SG)                                                                                                                                                                                                                                                                                                                                                                                                                                                                                                                                             |                                                                                    |
| IPSC                                | MGP (chr12:14854918:IG)                                                                                                                                                                                                                                                                                                                                                                                                                                                                                                                                             |                                                                                    |
| IRIS_PIGMENT_EPITHELIAL_CELL        | ART4 (chr12:14835521:SG, chr12:14840136:SG, chr12:14840214:SG, chr12:14840505:SG, chr12:14840674:SG, chr12:14840920:SG), MGP (chr12:14854918:IG)                                                                                                                                                                                                                                                                                                                                                                                                                    |                                                                                    |
| ISLET_PRECURSOR_CELL                | ART4 (chr12:14835521:SG, chr12:14840136:SG, chr12:14840214:SG, chr12:14840505:SG, chr12:14840674:SG, chr12:14840920:SG), MGP (chr12:14851053:SG, chr12:14851097:IG), MGP (chr12:14840136:SG, chr12:14840214:SG, chr12:14840505:SG, chr12:14840674:SG, chr12:14840920:SG)                                                                                                                                                                                                                                                                                            |                                                                                    |
| KERATINOCYTE                        | ART4 (chr12:14840136:SG, chr12:14840214:SG, chr12:14840505:SG, chr12:14840674:SG, chr12:14840920:SG, chr12:14851053:SG, chr12:14851097:IG), MGP (chr12:14897475:SG, chr12:14897803:SG)                                                                                                                                                                                                                                                                                                                                                                              |                                                                                    |
| KIDNEY                              | ART4 (chr12:14840136:SG, chr12:14840214:SG, chr12:14840505:SG, chr12:14840674:SG, chr12:14840920:SG, chr12:14847029:SG), MGP (chr12:14847029:SG, chr12:14854918:IG, chr12:14894016:SG, chr12:14901082:SG), WBP11 (chr12:14894016:SG)                                                                                                                                                                                                                                                                                                                                |                                                                                    |
| KIDNEY_CAPILLARY_ENDOTHELIAL_CELL   | ART4 (chr12:14835521:SG, chr12:14840136:SG, chr12:14840214:SG, chr12:14840505:SG, chr12:14840674:SG, chr12:14840920:SG)                                                                                                                                                                                                                                                                                                                                                                                                                                             |                                                                                    |
| KIDNEY_CELL                         | WBP11 (chr12:14835521:SG), ART4 (chr12:14835521:SG, chr12:14840136:SG, chr12:14840214:SG, chr12:14840505:SG, chr12:14840674:SG, chr12:14840920:SG)                                                                                                                                                                                                                                                                                                                                                                                                                  |                                                                                    |
| KIDNEY_CLEAR_CELL_CARCINOMA         | ART4 (chr12:14835521:SG, chr12:14840136:SG, chr12:14840214:SG, chr12:14840505:SG, chr12:14840674:SG, chr12:14840920:SG)                                                                                                                                                                                                                                                                                                                                                                                                                                             |                                                                                    |
| KIDNEY_EPITHELIAL_CELL              | ART4 (chr12:14835521:SG)                                                                                                                                                                                                                                                                                                                                                                                                                                                                                                                                            |                                                                                    |
| KIDNEY_RHABDIOID_TUMOR              | MGP (chr12:14897475:SG, chr12:14897803:SG)                                                                                                                                                                                                                                                                                                                                                                                                                                                                                                                          |                                                                                    |
| LARGE_CELL_LUNG_CANCER              | ART4 (chr12:14835521:SG, chr12:14840136:SG, chr12:14840214:SG, chr12:14840505:SG, chr12:14840674:SG, chr12:14840920:SG)                                                                                                                                                                                                                                                                                                                                                                                                                                             |                                                                                    |
| LARGE_INTESTINE                     | ART4 (chr12:14835521:SG, chr12:14840136:SG, chr12:14840214:SG, chr12:14840505:SG, chr12:14840674:SG, chr12:14840920:SG, chr12:14844512:SG, H2A1 (chr12:14836364:SG), MGP (chr12:14840136:SG, chr12:14840214:SG, chr12:14840505:SG, chr12:14840674:SG, chr12:14840920:SG, chr12:14847029:SG, chr12:14894016:SG), WBP11 (chr12:14844512:SG, chr12:14894016:SG)                                                                                                                                                                                                        |                                                                                    |
| LEG_MUSCLE                          | ART4 (chr12:14847029:SG), MGP (chr12:14847029:SG, chr12:14854918:IG, chr12:14894016:SG, chr12:14897475:SG, chr12:14897803:SG), WBP11 (chr12:14894016:SG)                                                                                                                                                                                                                                                                                                                                                                                                            |                                                                                    |
| LIMB_EMBRYO                         | ART4 (chr12:14835521:SG, chr12:14840136:SG, chr12:14840214:SG, chr12:14840505:SG, chr12:14840674:SG, chr12:14840920:SG), MGP (chr12:14847029:SG, chr12:14854918:IG, chr12:14894016:SG, chr12:14897475:SG, chr12:14897803:SG), WBP11 (chr12:14894016:SG)                                                                                                                                                                                                                                                                                                             |                                                                                    |
| LIVER                               | ART4 (chr12:14835521:SG, chr12:14840136:SG, chr12:14840214:SG, chr12:14840505:SG, chr12:14840674:SG, chr12:14840920:SG, chr12:14844512:SG, H2A1 (chr12:14836364:SG, chr12:14840136:SG, chr12:14840214:SG, chr12:14840505:SG, chr12:14840674:SG, chr12:14840920:SG), MGP (chr12:14840136:SG, chr12:14840214:SG, chr12:14840505:SG, chr12:14840674:SG, chr12:14840920:SG, chr12:14844512:SG, chr12:14847029:SG, chr12:14894016:SG), GUCY2C (chr12:14840136:SG, chr12:14840214:SG, chr12:14840505:SG, chr12:14840674:SG, chr12:14840920:SG), WBP11 (chr12:14844512:SG) |                                                                                    |
| LUNG                                | ART4 (chr12:14835521:SG, chr12:14840136:SG, chr12:14840214:SG, chr12:14840505:SG, chr12:14840674:SG, chr12:14840920:SG, chr12:14844512:SG), MGP (chr12:14847029:SG, chr12:14854918:IG, chr12:14894016:SG, chr12:14897475:SG, chr12:14897803:SG, chr12:14901082:SG), WBP11 (chr12:14890950:SG, chr12:14890963:SG, chr12:14894016:SG)                                                                                                                                                                                                                                 |                                                                                    |
| LUNG_ADENOCARCINOMA                 | ART4 (chr12:14835521:SG, chr12:14840136:SG, chr12:14840214:SG, chr12:14840505:SG, chr12:14840674:SG, chr12:14840920:SG)                                                                                                                                                                                                                                                                                                                                                                                                                                             |                                                                                    |
| LUNG_EPITHELIAL_CARCINOMA           | ART4 (chr12:14835521:SG, chr12:14840136:SG, chr12:14840214:SG, chr12:14840505:SG, chr12:14840674:SG, chr12:14840920:SG, chr12:14844512:SG, H2A1 (chr12:14836364:SG), MGP (chr12:14840136:SG, chr12:14840214:SG, chr12:14840505:SG, chr12:14840674:SG, chr12:14840920:SG), ERP27 (chr12:14840136:SG, chr12:14840214:SG, chr12:14840505:SG, chr12:14840674:SG, chr12:14840920:SG), WBP11 (chr12:14844512:SG, chr12:14840674:SG)                                                                                                                                       | CGN11 (chr15:57923529:SG), ALDH1A2 (chr15:57923529:SG), RNF111 (chr15:57923529:SG) |
| LUNG_FIBROBLAST                     | ART4 (chr12:14835521:SG, chr12:14840136:SG, chr12:14840214:SG, chr12:14840505:SG, chr12:14840674:SG, chr12:14840920:SG), MGP (chr12:14854918:IG, chr12:14894016:SG, chr12:14901082:SG), WBP11 (chr12:14894016:SG)                                                                                                                                                                                                                                                                                                                                                   |                                                                                    |
| LUNG_MICROVASCULAR_ENDOTHELIAL_CELL | ART4 (chr12:14835521:SG, chr12:14840136:SG, chr12:14840214:SG, chr12:14840505:SG, chr12:14840674:SG, chr12:14840920:SG), MGP (chr12:14894016:SG)                                                                                                                                                                                                                                                                                                                                                                                                                    |                                                                                    |
| LYMPHOBLASTOID_CELL_LINE            | ART4 (chr12:14835521:SG, chr12:14840136:SG, chr12:14840214:SG, chr12:14840505:SG, chr12:14840674:SG, chr12:14840920:SG, chr12:14851053:SG, chr12:14851097:IG), MGP (chr12:14840136:SG, chr12:14840214:SG, chr12:14840505:SG, chr12:14840674:SG, chr12:14840920:SG, chr12:14854918:IG)                                                                                                                                                                                                                                                                               |                                                                                    |
| LYMPHOCYTE                          | MGP (chr12:14854918:IG)                                                                                                                                                                                                                                                                                                                                                                                                                                                                                                                                             |                                                                                    |
| MAMMARY_EPITHELIAL_CELL             | ART4 (chr12:14840136:SG, chr12:14840214:SG, chr12:14840505:SG, chr12:14840674:SG, chr12:14840920:SG)                                                                                                                                                                                                                                                                                                                                                                                                                                                                |                                                                                    |
| MAMMARY_FIBROBLAST                  | ART4 (chr12:14835521:SG, chr12:14840136:SG, chr12:14840214:SG, chr12:14840505:SG, chr12:14840674:SG, chr12:14840920:SG), MGP (chr12:14854918:IG, chr12:14894016:SG, chr12:14901082:SG)                                                                                                                                                                                                                                                                                                                                                                              |                                                                                    |
| MAMMARY_GLAND_ADENOCARCINOMA        | ART4 (chr12:14835521:SG, chr12:14840136:SG, chr12:14840214:SG, chr12:14840505:SG, chr12:14840674:SG, chr12:14840920:SG), MGP (chr12:14840920:SG, chr12:14854918:IG, chr12:14901082:SG)                                                                                                                                                                                                                                                                                                                                                                              |                                                                                    |
| MAMMARY_GLAND_DUCTAL_CARCINOMA      | ART4 (chr12:14835521:SG, chr12:14840136:SG, chr12:14840214:SG, chr12:14840505:SG, chr12:14840674:SG, chr12:14840920:SG), MGP (chr12:14840920:SG, chr12:14879684:SG, chr12:14879827:SG, chr12:14879925:IG, chr12:14879926:SG, chr12:14901082:SG)                                                                                                                                                                                                                                                                                                                     |                                                                                    |
| MAMMARY_LUMINAL_EPITHELIAL_CELL     | ART4 (chr12:14847029:SG), MGP (chr12:14847029:SG, chr12:14894016:SG)                                                                                                                                                                                                                                                                                                                                                                                                                                                                                                |                                                                                    |
| MAMMARY_MYOEPIHELIAL_CELL           | ART4 (chr12:14840136:SG, chr12:14840214:SG, chr12:14840505:SG, chr12:14840674:SG, chr12:14840920:SG), MGP (chr12:14897475:SG, chr12:14897803:SG, chr12:14901082:SG), GUCY2C (chr12:14911328:SG)                                                                                                                                                                                                                                                                                                                                                                     |                                                                                    |
| MAMMARY_STEM_CELL                   | ART4 (chr12:14847029:SG), MGP (chr12:14847029:SG, chr12:14894016:SG)                                                                                                                                                                                                                                                                                                                                                                                                                                                                                                |                                                                                    |
| MEDULLA_OBLONGATA                   | MGP (chr12:14894016:SG)                                                                                                                                                                                                                                                                                                                                                                                                                                                                                                                                             |                                                                                    |
| MEDULLOBLASTOMA                     | ART4 (chr12:14840136:SG, chr12:14840214:SG, chr12:14840505:SG, chr12:14840674:SG, chr12:14840920:SG), ERP27 (chr12:14840136:SG, chr12:14840214:SG, chr12:14840505:SG, chr12:14840674:SG, chr12:14840920:SG)                                                                                                                                                                                                                                                                                                                                                         |                                                                                    |
| MELANOMA                            | ART4 (chr12:14835521:SG, chr12:14840136:SG, chr12:14840214:SG, chr12:14840505:SG, chr12:14840674:SG, chr12:14840920:SG), MGP (chr12:14851053:SG, chr12:14851097:IG), MGP (chr12:14894016:SG), WBP11 (chr12:14894016:SG), GUCY2C (chr12:14911328:SG)                                                                                                                                                                                                                                                                                                                 |                                                                                    |
| MESENCHYMAL_STEM_CELL               | ART4 (chr12:14835521:SG, chr12:14840136:SG, chr12:14840214:SG, chr12:14840505:SG, chr12:14840674:SG, chr12:14840920:SG), H2A1 (chr12:14840136:SG, chr12:14840214:SG, chr12:14840505:SG, chr12:14840674:SG, chr12:14840920:SG), MGP (chr12:14854918:IG, chr12:14894016:SG, chr12:14897475:SG, chr12:14897803:SG, chr12:14901082:SG)                                                                                                                                                                                                                                  |                                                                                    |
| MESODERMAL_DERIV                    | ART4 (chr12:14835521:SG, chr12:14840136:SG, chr12:14840214:SG, chr12:14840505:SG, chr12:14840674:SG, chr12:14840920:SG), MGP (chr12:14854918:IG, chr12:14894016:SG, chr12:14899824:SG, chr12:14899901:SG, chr12:14900018:SG)                                                                                                                                                                                                                                                                                                                                        |                                                                                    |
| MIDBRAIN                            | MGP (chr12:14894016:SG)                                                                                                                                                                                                                                                                                                                                                                                                                                                                                                                                             |                                                                                    |
| MIDDLE_FRONTAL_AREA                 | MGP (chr12:14894016:SG)                                                                                                                                                                                                                                                                                                                                                                                                                                                                                                                                             |                                                                                    |
| MIDDLE_FRONTAL_GYRUS                | MGP (chr12:14894016:SG)                                                                                                                                                                                                                                                                                                                                                                                                                                                                                                                                             |                                                                                    |
| MPP                                 | ART4 (chr12:14835521:SG, chr12:14840136:SG, chr12:14840214:SG, chr12:14840505:SG, chr12:14840674:SG, chr12:14840920:SG, chr12:14844512:SG, H2A1 (chr12:14836364:SG), WBP11 (chr12:14844512:SG, chr12:14901082:SG), MGP (chr12:14844512:SG, chr12:14847029:SG, chr12:14894016:SG, chr12:14897475:SG, chr12:14897803:SG, chr12:14901082:SG)                                                                                                                                                                                                                           |                                                                                    |
| MUSCLE_EWING_SARCOMA                | MGP (chr12:14894016:SG, chr12:14897475:SG, chr12:14897803:SG)                                                                                                                                                                                                                                                                                                                                                                                                                                                                                                       |                                                                                    |
| MYELOGENOUS_LEUKEMIA                | ART4 (chr12:14835521:SG, chr12:14840136:SG, chr12:14840214:SG, chr12:14840505:SG, chr12:14840674:SG, chr12:14840920:SG)                                                                                                                                                                                                                                                                                                                                                                                                                                             |                                                                                    |
| MYELOMA                             | ART4 (chr12:14851053:SG, chr12:14851097:IG)                                                                                                                                                                                                                                                                                                                                                                                                                                                                                                                         |                                                                                    |

|                                       |                                                                                                                                                                                                                                                                                                                                                                                                                                                                                         |
|---------------------------------------|-----------------------------------------------------------------------------------------------------------------------------------------------------------------------------------------------------------------------------------------------------------------------------------------------------------------------------------------------------------------------------------------------------------------------------------------------------------------------------------------|
| MYOCYTE                               | ART4 (chr12:14840136:SG, chr12:14840214:SG, chr12:14840505:SG, chr12:14840674:SG, chr12:14840920:SG)                                                                                                                                                                                                                                                                                                                                                                                    |
| NEURAL_PROGENITOR_DERIV               | ART4 (chr12:14835521:SG), MGP (chr12:14854918:IG, chr12:14894016:SG)                                                                                                                                                                                                                                                                                                                                                                                                                    |
| NEUROBLASTOMA                         | ART4 (chr12:14835521:SG)                                                                                                                                                                                                                                                                                                                                                                                                                                                                |
| NEUROEPITHELIOMA                      | MGP (chr12:14894016:SG, chr12:14897475:SG, chr12:14897803:SG, chr12:14901082:SG)                                                                                                                                                                                                                                                                                                                                                                                                        |
| NEUROGLIOMA                           | ART4 (chr12:14840136:SG, chr12:14840214:SG, chr12:14840505:SG, chr12:14840674:SG, chr12:14840920:SG)                                                                                                                                                                                                                                                                                                                                                                                    |
| NEURON_DERIV                          | ART4 (chr12:14835521:SG, chr12:14847029:SG), MGP (chr12:14847029:SG, chr12:14901082:SG), WBP11 (chr12:14901082:SG)                                                                                                                                                                                                                                                                                                                                                                      |
| NEUROSPHERE                           | ART4 (chr12:14835521:SG)                                                                                                                                                                                                                                                                                                                                                                                                                                                                |
| NON-PIGMENTED_CILIARY_EPITHELIAL_CELL | ART4 (chr12:14840136:SG, chr12:14840214:SG, chr12:14840505:SG, chr12:14840674:SG, chr12:14840920:SG), MGP (chr12:14854918:IG)                                                                                                                                                                                                                                                                                                                                                           |
| OCCIPITAL_LOBE                        | MGP (chr12:14894016:SG)                                                                                                                                                                                                                                                                                                                                                                                                                                                                 |
| OLFACTORY_NEUROSPHERE                 | ART4 (chr12:14835521:SG, chr12:14840136:SG, chr12:14840214:SG, chr12:14840505:SG, chr12:14840674:SG, chr12:14840920:SG), MGP (chr12:14894016:SG), WBP11 (chr12:14894016:SG)                                                                                                                                                                                                                                                                                                             |
| OMENTAL_FAT_PAD                       | ART4 (chr12:14840136:SG, chr12:14840214:SG, chr12:14840505:SG, chr12:14840674:SG, chr12:14840920:SG), MGP (chr12:14894016:SG), WBP11 (chr12:14894016:SG)                                                                                                                                                                                                                                                                                                                                |
| OSTEOBLAST                            | ART4 (chr12:14835521:SG, chr12:14840136:SG, chr12:14840214:SG, chr12:14840505:SG, chr12:14840674:SG, chr12:14840920:SG), MGP (chr12:14854918:IG)                                                                                                                                                                                                                                                                                                                                        |
| OSTEOSARCOMA                          | ART4 (chr12:14835521:SG, chr12:14840136:SG, chr12:14840214:SG, chr12:14840505:SG, chr12:14840674:SG, chr12:14840920:SG), MGP (chr12:14854918:IG, chr12:14897475:SG, chr12:14897803:SG)                                                                                                                                                                                                                                                                                                  |
| OVARY                                 | ART4 (chr12:14835521:SG, chr12:14840136:SG, chr12:14840214:SG, chr12:14840505:SG, chr12:14840674:SG, chr12:14840920:SG, chr12:14847029:SG), MGP (chr12:14847029:SG, chr12:14854918:IG, chr12:14890950:SG, chr12:14890963:SG, chr12:14894016:SG, chr12:14901082:SG), STRAP (chr12:14890950:SG, chr12:14890963:SG), WBP11 (chr12:14894016:SG)                                                                                                                                             |
| PANCREAS                              | ART4 (chr12:14840136:SG, chr12:14840214:SG, chr12:14840505:SG, chr12:14840674:SG, chr12:14840920:SG), MGP (chr12:14901082:SG)                                                                                                                                                                                                                                                                                                                                                           |
| PANCREATIC_DUCT_EPITHELIAL_CELL       | WBP11 (chr12:14835521:SG), ART4 (chr12:14835521:SG, chr12:14840136:SG, chr12:14840214:SG, chr12:14840505:SG, chr12:14840674:SG, chr12:14840920:SG)                                                                                                                                                                                                                                                                                                                                      |
| PARATHYROID_ADENOMA                   | ART4 (chr12:14840136:SG, chr12:14840214:SG, chr12:14840505:SG, chr12:14840674:SG, chr12:14840920:SG), MGP (chr12:14894016:SG)                                                                                                                                                                                                                                                                                                                                                           |
| PERICYTE                              | MGP (chr12:14854918:IG)                                                                                                                                                                                                                                                                                                                                                                                                                                                                 |
| PERIODONTAL_LIGAMENT_FIBROBLAST       | MGP (chr12:14854918:IG)                                                                                                                                                                                                                                                                                                                                                                                                                                                                 |
| PEYERS_PATCH                          | ART4 (chr12:14840136:SG, chr12:14840214:SG, chr12:14840505:SG, chr12:14840674:SG, chr12:14840920:SG), MGP (chr12:14894016:SG, chr12:14901082:SG)                                                                                                                                                                                                                                                                                                                                        |
| PLACENTA                              | ART4 (chr12:14835521:SG, chr12:14840136:SG, chr12:14840214:SG, chr12:14840505:SG, chr12:14840674:SG, chr12:14840920:SG, chr12:14844512:SG, chr12:14851053:SG, chr12:14851097:IG), MGP (chr12:14844512:SG, chr12:14894016:SG, chr12:14901082:SG), WBP11 (chr12:14901082:SG)                                                                                                                                                                                                              |
| PLASMA_CELL_MYELOMA                   | ART4 (chr12:14851053:SG, chr12:14851097:IG)                                                                                                                                                                                                                                                                                                                                                                                                                                             |
| PONS                                  | MGP (chr12:14894016:SG)                                                                                                                                                                                                                                                                                                                                                                                                                                                                 |
| PROSTATE_ADENOCARCINOMA               | ART4 (chr12:14835521:SG, chr12:14840136:SG, chr12:14840214:SG, chr12:14840505:SG, chr12:14840674:SG, chr12:14840920:SG)                                                                                                                                                                                                                                                                                                                                                                 |
| PROSTATE_EPITHELIAL_CARCINOMA         | ART4 (chr12:14840136:SG, chr12:14840214:SG, chr12:14840505:SG, chr12:14840674:SG, chr12:14840920:SG, chr12:14847029:SG), MGP (chr12:14840136:SG, chr12:14840214:SG, chr12:14840505:SG, chr12:14840674:SG, chr12:14840920:SG, chr12:14847029:SG), SMC03 (chr12:14840920:SG)                                                                                                                                                                                                              |
| PROSTATE_EPITHELIAL_CELL              | ART4 (chr12:14835521:SG, chr12:14840136:SG, chr12:14840214:SG, chr12:14840505:SG, chr12:14840674:SG, chr12:14840920:SG)                                                                                                                                                                                                                                                                                                                                                                 |
| PROSTATE_GLAND                        | ART4 (chr12:14840136:SG, chr12:14840214:SG, chr12:14840505:SG, chr12:14840674:SG, chr12:14840920:SG), MGP (chr12:14894016:SG)                                                                                                                                                                                                                                                                                                                                                           |
| PROXIMAL_TUBULE_EPITHELIAL_CELL       | ART4 (chr12:14835521:SG, chr12:14840136:SG, chr12:14840214:SG, chr12:14840505:SG, chr12:14840674:SG, chr12:14840920:SG)                                                                                                                                                                                                                                                                                                                                                                 |
| PSOAS_MUSCLE                          | ART4 (chr12:14835521:SG, chr12:14840136:SG, chr12:14840214:SG, chr12:14840505:SG, chr12:14840674:SG, chr12:14840920:SG), MGP (chr12:14894016:SG, chr12:14901082:SG)                                                                                                                                                                                                                                                                                                                     |
| PULMONARY_ARTERY_ENDOTHELIAL_CELL     | ART4 (chr12:14835521:SG, chr12:14840136:SG, chr12:14840214:SG, chr12:14840505:SG, chr12:14840674:SG, chr12:14840920:SG)                                                                                                                                                                                                                                                                                                                                                                 |
| PULMONARY_ARTERY_FIBROBLAST           | ART4 (chr12:14835521:SG, chr12:14840136:SG, chr12:14840214:SG, chr12:14840505:SG, chr12:14840674:SG, chr12:14840920:SG), MGP (chr12:14854918:IG, chr12:14894016:SG), WBP11 (chr12:14894016:SG)                                                                                                                                                                                                                                                                                          |
| PUTAMEN                               | MGP (chr12:14894016:SG)                                                                                                                                                                                                                                                                                                                                                                                                                                                                 |
| RECTUM_MUCOSA                         | ART4 (chr12:14840136:SG, chr12:14840214:SG, chr12:14840505:SG, chr12:14840674:SG, chr12:14840920:SG, chr12:14847029:SG), MGP (chr12:14847029:SG, chr12:14894016:SG), GUCY2C (chr12:14911328:SG)                                                                                                                                                                                                                                                                                         |
| RECTUM_MUSCLE                         | MGP (chr12:14894016:SG, chr12:14901082:SG)                                                                                                                                                                                                                                                                                                                                                                                                                                              |
| RENAL_CELL_ADENOCARCINOMA             | ART4 (chr12:14835521:SG, chr12:14840136:SG, chr12:14840214:SG, chr12:14840505:SG, chr12:14840674:SG, chr12:14840920:SG)                                                                                                                                                                                                                                                                                                                                                                 |
| RENAL_CELL_CARCINOMA                  | ART4 (chr12:14835521:SG, chr12:14840136:SG, chr12:14840214:SG, chr12:14840505:SG, chr12:14840674:SG, chr12:14840920:SG)                                                                                                                                                                                                                                                                                                                                                                 |
| RENAL_CORTEX_INTERSTITIUM             | ART4 (chr12:14840136:SG, chr12:14840214:SG, chr12:14840505:SG, chr12:14840674:SG, chr12:14840920:SG, chr12:14847029:SG), MGP (chr12:14847029:SG, chr12:14854918:IG, chr12:14894016:SG), WBP11 (chr12:14894016:SG)                                                                                                                                                                                                                                                                       |
| RENAL_CORTICAL_EPITHELIAL_CELL        | ART4 (chr12:14840136:SG, chr12:14840214:SG, chr12:14840505:SG, chr12:14840674:SG, chr12:14840920:SG), GUCY2C (chr12:14911328:SG)                                                                                                                                                                                                                                                                                                                                                        |
| RENAL_PELVIS                          | ART4 (chr12:14840136:SG, chr12:14840214:SG, chr12:14840505:SG, chr12:14840674:SG, chr12:14840920:SG, chr12:14847029:SG), MGP (chr12:14847029:SG, chr12:14854918:IG, chr12:14894016:SG), WBP11 (chr12:14894016:SG)                                                                                                                                                                                                                                                                       |
| SIGMOID_COLON                         | ART4 (chr12:14840136:SG, chr12:14840214:SG, chr12:14840505:SG, chr12:14840674:SG, chr12:14840920:SG), MGP (chr12:14854918:IG, chr12:14894016:SG, chr12:14897475:SG, chr12:14897803:SG, chr12:14901082:SG), GUCY2C (chr12:14911328:SG)                                                                                                                                                                                                                                                   |
| SKELETAL_MUSCLE                       | ART4 (chr12:14840136:SG, chr12:14840214:SG, chr12:14840505:SG, chr12:14840674:SG, chr12:14840920:SG, chr12:14847029:SG), MGP (chr12:14847029:SG, chr12:14854918:IG, chr12:1489684:SG, chr12:1489827:SG, chr12:1489925:IG, chr12:1489926:SG, chr12:14894016:SG, chr12:14897475:SG, chr12:14897803:SG, chr12:14901082:SG)                                                                                                                                                                 |
| SKELETAL_MUSCLE_CELL                  | ART4 (chr12:14840136:SG, chr12:14840214:SG, chr12:14840505:SG, chr12:14840674:SG, chr12:14840920:SG)                                                                                                                                                                                                                                                                                                                                                                                    |
| SKELETAL_MUSCLE_MYOBlast              | ART4 (chr12:14835521:SG, chr12:14840136:SG, chr12:14840214:SG, chr12:14840505:SG, chr12:14840674:SG, chr12:14840920:SG)                                                                                                                                                                                                                                                                                                                                                                 |
| SKELETAL_MUSCLE_SATELLITE_CELL        | ART4 (chr12:14840136:SG, chr12:14840214:SG, chr12:14840505:SG, chr12:14840674:SG, chr12:14840920:SG), MGP (chr12:14854918:IG)                                                                                                                                                                                                                                                                                                                                                           |
| SKIN_FIBROBLAST                       | ART4 (chr12:14835521:SG, chr12:14840136:SG, chr12:14840214:SG, chr12:14840505:SG, chr12:14840674:SG, chr12:14840920:SG, chr12:14847029:SG, chr12:14847029:SG), WBP11 (chr12:14847029:SG), MGP (chr12:14847029:SG, chr12:14854918:IG, chr12:14897475:SG, chr12:14897803:SG)                                                                                                                                                                                                              |
| SKIN_LEG                              | ART4 (chr12:14840136:SG, chr12:14840214:SG, chr12:14840505:SG, chr12:14840674:SG, chr12:14840920:SG), MGP (chr12:14894016:SG)                                                                                                                                                                                                                                                                                                                                                           |
| SKIN_OF_BODY                          | MGP (chr12:14847029:SG, chr12:14894016:SG)                                                                                                                                                                                                                                                                                                                                                                                                                                              |
| SMALL_INTESTINE                       | ART4 (chr12:14840136:SG, chr12:14840214:SG, chr12:14840505:SG, chr12:14840674:SG, chr12:14840920:SG), MGP (chr12:14894016:SG)                                                                                                                                                                                                                                                                                                                                                           |
| SMOOTH_MUSCLE_DERIV                   | ART4 (chr12:14835521:SG, chr12:14840136:SG, chr12:14840214:SG, chr12:14840505:SG, chr12:14840674:SG, chr12:14840920:SG), MGP (chr12:14854918:IG, chr12:14894016:SG, chr12:14897475:SG, chr12:14897803:SG, chr12:14899824:SG, chr12:14899901:SG, chr12:14900018:SG)                                                                                                                                                                                                                      |
| SPINAL_CORD                           | ART4 (chr12:14835521:SG), MGP (chr12:14854918:IG, chr12:14894016:SG), WBP11 (chr12:14894016:SG)                                                                                                                                                                                                                                                                                                                                                                                         |
| SPLIEN                                | ART4 (chr12:14835521:SG, chr12:14840136:SG, chr12:14840214:SG, chr12:14840505:SG, chr12:14840674:SG, chr12:14840920:SG, chr12:14844512:SG), MGP (chr12:14840674:SG, chr12:14840920:SG, chr12:14844512:SG, chr12:14847029:SG, chr12:14894016:SG), ERP27 (chr12:14840136:SG, chr12:14840214:SG, chr12:14840505:SG, chr12:14840674:SG, chr12:14840920:SG), H2A1 (chr12:14840136:SG, chr12:14840214:SG, chr12:14840505:SG, chr12:14840674:SG, chr12:14840920:SG), WBP11 (chr12:14844512:SG) |
| SQUAMOUS_CELL_CARCINOMA               | ART4 (chr12:14835521:SG, chr12:14840136:SG, chr12:14840214:SG, chr12:14840505:SG, chr12:14840674:SG, chr12:14840920:SG)                                                                                                                                                                                                                                                                                                                                                                 |
| STOMACH                               | ART4 (chr12:14835521:SG, chr12:14840136:SG, chr12:14840214:SG, chr12:14840505:SG, chr12:14840674:SG, chr12:14840920:SG), MGP (chr12:14854918:IG, chr12:14894016:SG, chr12:14897475:SG, chr12:14897803:SG), WBP11 (chr12:14894016:SG)                                                                                                                                                                                                                                                    |

|                                 |                                                                                                                                                                                                                                                                                                                                                                                                         |                             |
|---------------------------------|---------------------------------------------------------------------------------------------------------------------------------------------------------------------------------------------------------------------------------------------------------------------------------------------------------------------------------------------------------------------------------------------------------|-----------------------------|
| STOMACH_MUSCLE                  | ART4 (chr12:14840136:SG, chr12:14840214:SG, chr12:14840505:SG, chr12:14840674:SG, chr12:14840920:SG), MGP (chr12:14894016:SG), WBP11 (chr12:14894016:SG)                                                                                                                                                                                                                                                |                             |
| SUBSTANTIA_NIGRA                | ART4 (chr12:14835521:SG, chr12:14847029:SG), MGP (chr12:14847029:SG, chr12:14894016:SG)                                                                                                                                                                                                                                                                                                                 |                             |
| SUPERIOR_TEMPORAL_GYRUS         | MGP (chr12:14894016:SG)                                                                                                                                                                                                                                                                                                                                                                                 |                             |
| T17_CELL                        | ART4 (chr12:14840136:SG, chr12:14840214:SG, chr12:14840505:SG, chr12:14840674:SG, chr12:14840920:SG)                                                                                                                                                                                                                                                                                                    |                             |
| TEMPORAL_LOBE                   | ART4 (chr12:14835521:SG), MGP (chr12:14894016:SG)                                                                                                                                                                                                                                                                                                                                                       |                             |
| TESTIS                          | ART4 (chr12:14840136:SG, chr12:14840214:SG, chr12:14840505:SG, chr12:14840674:SG, chr12:14840920:SG), MGP (chr12:14847029:SG, chr12:14894016:SG), WBP11 (chr12:14894016:SG)                                                                                                                                                                                                                             |                             |
| THORACIC_AORTA                  | ART4 (chr12:14835521:SG, chr12:14840136:SG, chr12:14840214:SG, chr12:14840505:SG, chr12:14840674:SG, chr12:14840920:SG, chr12:14844512:SG, chr12:14847029:SG), MGP (chr12:14847029:SG, chr12:14854918:IG, chr12:14879684:SG, chr12:14879827:SG, chr12:14879925:IG, chr12:14879926:SG, chr12:14890950:SG, chr12:14890963:SG, chr12:14894016:SG, chr12:14897475:SG, chr12:14897803:SG, chr12:14901082:SG) |                             |
| THYROID_GLAND                   | ART4 (chr12:14835521:SG, chr12:14840136:SG, chr12:14840214:SG, chr12:14840505:SG, chr12:14840674:SG, chr12:14840920:SG), H2AJ (chr12:14840136:SG, chr12:14840214:SG, chr12:14840505:SG, chr12:14840674:SG, chr12:14840920:SG), MGP (chr12:14844512:SG, chr12:14847029:SG, chr12:14854918:IG, chr12:14894016:SG)                                                                                         |                             |
| TIBIAL_ARTERY                   | ART4 (chr12:14840136:SG, chr12:14840214:SG, chr12:14840505:SG, chr12:14840674:SG, chr12:14840920:SG), MGP (chr12:14894016:SG)                                                                                                                                                                                                                                                                           |                             |
| TIBIAL_NERVE                    | ART4 (chr12:14835521:SG, chr12:14840136:SG, chr12:14840214:SG, chr12:14840505:SG, chr12:14840674:SG, chr12:14840920:SG), MGP (chr12:14890950:SG, chr12:14890963:SG, chr12:14894016:SG, chr12:14901082:SG), WBP11 (chr12:14901082:SG)                                                                                                                                                                    |                             |
| TONGUE                          | MGP (chr12:14854918:IG, chr12:14894016:SG)                                                                                                                                                                                                                                                                                                                                                              |                             |
| TRANSVERSE_COLON                | ART4 (chr12:14840136:SG, chr12:14840214:SG, chr12:14840505:SG, chr12:14840674:SG, chr12:14840920:SG), MGP (chr12:14894016:SG), WBP11 (chr12:14894016:SG)                                                                                                                                                                                                                                                |                             |
| TROPHOBLAST                     | ART4 (chr12:14835521:SG, chr12:14840136:SG, chr12:14840214:SG, chr12:14840505:SG, chr12:14840674:SG, chr12:14840920:SG, chr12:14851053:SG, chr12:14851097:IG), MGP (chr12:14840136:SG, chr12:14840214:SG, chr12:14840505:SG, chr12:14840674:SG, chr12:14840920:SG, chr12:14854918:IG, chr12:14901082:SG)                                                                                                |                             |
| TROPHOBLAST_DERIV               | ART4 (chr12:14835521:SG, chr12:14851053:SG, chr12:14851097:IG)                                                                                                                                                                                                                                                                                                                                          |                             |
| TRUNK_MUSCLE                    | MGP (chr12:14847029:SG, chr12:14854918:IG, chr12:14894016:SG, chr12:14897475:SG, chr12:14897803:SG), ART4 (chr12:14847029:SG)                                                                                                                                                                                                                                                                           |                             |
| TUBULE_CELL                     | ART4 (chr12:14840136:SG, chr12:14840214:SG, chr12:14840505:SG, chr12:14840674:SG, chr12:14840920:SG)                                                                                                                                                                                                                                                                                                    |                             |
| UMBILICAL_CORD                  | ART4 (chr12:14835521:SG, chr12:14840136:SG, chr12:14840214:SG, chr12:14840505:SG, chr12:14840674:SG, chr12:14840920:SG), MGP (chr12:14894016:SG, chr12:14897475:SG, chr12:14897803:SG)                                                                                                                                                                                                                  |                             |
| UMBILICAL_VEIN_ENDOTHELIAL_CELL | ART4 (chr12:14835521:SG, chr12:14840136:SG, chr12:14840214:SG, chr12:14840505:SG, chr12:14840674:SG, chr12:14840920:SG, chr12:14847029:SG), MGP (chr12:14847029:SG, chr12:14854918:IG, chr12:14879684:SG, chr12:14879827:SG, chr12:14879925:IG, chr12:14879926:SG, chr12:14894016:SG), WBP11 (chr12:14847029:SG, chr12:14894016:SG)                                                                     |                             |
| URINARY_BLADDER                 | ART4 (chr12:14847029:SG), MGP (chr12:14847029:SG, chr12:14894016:SG, chr12:14901082:SG), WBP11 (chr12:14894016:SG)                                                                                                                                                                                                                                                                                      |                             |
| UROTHELIUM_CELL                 | ART4 (chr12:14835521:SG, chr12:14840136:SG, chr12:14840214:SG, chr12:14840505:SG, chr12:14840674:SG, chr12:14840920:SG)                                                                                                                                                                                                                                                                                 |                             |
| UTERUS                          | ART4 (chr12:14840136:SG, chr12:14840214:SG, chr12:14840505:SG, chr12:14840674:SG, chr12:14840920:SG, chr12:14847029:SG), MGP (chr12:14847029:SG, chr12:14894016:SG, chr12:14901082:SG)                                                                                                                                                                                                                  | ALDH1A2 (chr15:58061348:SG) |
| VAGINA                          | ART4 (chr12:14840136:SG, chr12:14840214:SG, chr12:14840505:SG, chr12:14840674:SG, chr12:14840920:SG, chr12:14851053:SG, chr12:14851097:IG), MGP (chr12:14847029:SG, chr12:14879684:SG, chr12:14879827:SG, chr12:14879925:IG, chr12:14879926:SG, chr12:14890950:SG, chr12:14890963:SG, chr12:14894016:SG, chr12:14901082:SG)                                                                             |                             |
| VILLOUS_MESENCHYME_FIBROBLAST   | MGP (chr12:14854918:IG)                                                                                                                                                                                                                                                                                                                                                                                 |                             |

The variants are shown by their position in Build38, with SG ending for SNPs and IG for indels

**Supplementary Table 9. Enrichment-Analysis: EHOA association signals are nominally enriched within regulatory regions specific for vascular/endothelial cell types.**

| Annotation              | Number of overlapping GWAS loci | P-value | Expected intersection (95%CI) | Observed intersection (95%CI) | Enrichment (95%CI) |
|-------------------------|---------------------------------|---------|-------------------------------|-------------------------------|--------------------|
| Vascular-endothelial    | 4                               | 0.011   | 0.35 (0-0.75)                 | 1 (1.00-1.00)                 | 2.84 (2.84-2.84)   |
| Pulmonary development   | 3                               | 0.06    | 0.31 (0-0.75)                 | 0.75 (0.25-1)                 | 2.44 (0.813-3.25)  |
| Musculoskeletal         | 3                               | 0.27    | 0.50 (0-1)                    | 0.75 (0.25-1)                 | 1.52 (0.505-2.02)  |
| Digestive               | 3                               | 0.29    | 0.51 (0.25-1)                 | 0.75 (0.369-1)                | 1.47 (0.723-1.96)  |
| Myeloid-erythroid       | 3                               | 0.41    | 0.57 (0-1)                    | 0.75 (0.369-1)                | 1.32 (0.65-1.76)   |
| StromalA                | 1                               | 0.59    | 0.21 (0-0.5)                  | 0.25 (0-0.75)                 | 1.21 (0-3.61)      |
| Renal-cancer            | 2                               | 0.69    | 0.47 (0-0.75)                 | 0.5 (0-1)                     | 1.06 (0-2.12)      |
| Organ development-renal | 2                               | 0.72    | 0.50 (0-1)                    | 0.5 (0-1)                     | 0.99 (0-1.99)      |
| StromalB                | 3                               | 0.76    | 0.73 (0.25-1)                 | 0.75 (0.25-1)                 | 1.03 (0.342-1.37)  |
| Lymphoid                | 2                               | 0.52    | 0.60 (0.25-1)                 | 0.5 (0-1)                     | 0.83 (0-1.66)      |
| Primitive-embryonic     | 3                               | 0.55    | 0.82 (0.5-1)                  | 0.75 (0.25-1)                 | 0.91 (0.304-1.22)  |
| Placental-trophoblast   | 2                               | 0.48    | 0.63 (0.25-1)                 | 0.5 (0-1)                     | 0.80 (0-1.6)       |
| Cardiac                 | 1                               | 0.51    | 0.38 (0-0.75)                 | 0.25 (0-0.75)                 | 0.66 (0-1.99)      |
| Cancer-epithelial       | 1                               | 0.47    | 0.43 (0-1)                    | 0.25 (0-0.75)                 | 0.58 (0-1.75)      |
| Neural                  | 2                               | 0.30    | 0.71 (0.25-1)                 | 0.5 (0-1)                     | 0.70 (0-1.41)      |
| Tissue-invariant        | 0                               | 0.034   | 0.52 (0-1)                    | 0 (0-0)                       | 0 (0-0)            |

Supplementary Table 10. Association of EHOA variants and correlated GWS variants in public datasets

| Locus           | Variant     | EHOA / Correlated GWS | EA  | NEA | LD (r2) | P-value  | Beta   | Odds Ratio | Trait                                                | PMID          | N Cases | N Overall | Study ID                      |
|-----------------|-------------|-----------------------|-----|-----|---------|----------|--------|------------|------------------------------------------------------|---------------|---------|-----------|-------------------------------|
| 4q22.1-MEPE     | rs17013495  | EHOA                  | T   | C   |         | 8.5E-21  | 0.018  |            | Urate                                                |               |         | 411,640   | UKBio_deCODE                  |
| 4q22.1-MEPE     | rs17013495  | EHOA                  | T   | C   |         | 1.7E-07  |        | 1.06       | Gout                                                 |               | 16,353  | 431,047   | UKBio_deCODE                  |
| 4q22.1-MEPE     | rs17013495  | EHOA                  | T   | C   |         | 1.8E-07  |        | 0.93       | Plantar_fascial_fibromatosis                         |               | 12,959  | 431,047   | UKBio_deCODE                  |
| 4q22.1-MEPE     | rs17013495  | EHOA                  | T   | C   |         | 4.8E-07  | 0.038  |            | Pelvis_DXA_BMD                                       |               |         | 35,596    | UKBio_deCODE                  |
| 4q22.1-MEPE     | rs17013495  | EHOA                  | T   | C   |         | 5.2E-07  | -0.013 |            | Alkaline phosphatase                                 |               |         | 412,141   | UKBio_deCODE                  |
| 4q22.1-MEPE     | rs17013495  | EHOA                  | T   | C   |         | 5.3E-07  | -0.090 |            | Hand grip strength (left)                            |               |         | 359,704   | NEALE2_46_raw                 |
| 4q22.1-MEPE     | rs17013495  | EHOA                  | T   | C   |         | 8.1E-07  | 0.037  |            | Trunk_DXA_BMD                                        |               |         | 35,596    | UKBio_deCODE                  |
| 12p12.3-MGP     | rs1800801   | EHOA                  | T   | C   |         | 5.0E-35  | -0.029 |            | Mean_grip_strength                                   |               |         | 427,745   | UKBio_deCODE                  |
| 12p12.3-MGP     | rs1800801   | EHOA                  | T   | C   |         | 8.6E-33  | -0.219 |            | Hand grip strength (left)                            |               |         | 359,704   | NEALE2_46_raw                 |
| 12p12.3-MGP     | rs1800801   | EHOA                  | T   | C   |         | 8.2E-27  | -0.197 |            | Hand grip strength (right)                           |               |         | 359,729   | NEALE2_47_raw                 |
| 12p12.3-MGP     | rs1800801   | EHOA                  | T   | C   |         | 1.1E-14  | -0.015 |            | Heel bone mineral density                            | PMID:30598549 |         | 426,824   | GCST006979                    |
| 12p12.3-MGP     | rs1800801   | EHOA                  | T   | C   |         | 6.4E-11  |        | 1.05       | Any fracture over 40 years                           |               | 55,982  | 431,047   | UKBio_deCODE                  |
| 12p12.3-MGP     | rs1800801   | EHOA                  | T   | C   |         | 2.2E-10  | -0.016 |            | Speed_of_sound_through_heel_SOS                      |               |         | 399,133   | UKBio_deCODE                  |
| 12p12.3-MGP     | rs1800801   | EHOA                  | T   | C   |         | 1.4E-09  | -0.015 |            | Heel bone mineral density                            |               |         | 398,823   | UKBio_deCODE                  |
| 12p12.3-MGP     | rs1800801   | EHOA                  | T   | C   |         | 2.9E-09  |        | 1.03       | Any fracture                                         |               | 103,590 | 431,047   | UKBio_deCODE                  |
| 12p12.3-MGP     | rs1800801   | EHOA                  | T   | C   |         | 4.5E-09  | -0.015 |            | Heel_bone_ultrasound_T_score                         |               |         | 401,039   | UKBio_deCODE                  |
| 12p12.3-MGP     | rs1800801   | EHOA                  | T   | C   |         | 1.5E-08  |        | 1.04       | Low hand grip strength (60 years and older) (EWGSOP) | PMID:33510174 | 48,596  | 256,523   | GCST90007526                  |
| 12p12.3-MGP     | rs1800801   | EHOA                  | T   | C   |         | 7.2E-08  | -0.041 |            | DXA_Arms_BMD                                         |               |         | 35,597    | UKBio_deCODE                  |
| 12p12.3-MGP     | rs1800801   | EHOA                  | T   | C   |         | 1.7E-07  | -0.013 |            | Heel_broadband_ultrasound_attenuation_BUA            |               |         | 398,131   | UKBio_deCODE                  |
| 12p12.3-MGP     | rs1800801   | EHOA                  | T   | C   |         | 1.9E-07  | -0.010 |            | Appendicular lean mass                               | PMID:33097823 |         | 450,243   | GCST90000025                  |
| 12p12.3-MGP     | rs1800801   | EHOA                  | T   | C   |         | 2.3E-07  |        | 1.04       | Arthritis_unspecified                                |               | 46,615  | 431,047   | UKBio_deCODE                  |
| 12p12.3-MGP     | rs1800801   | EHOA                  | T   | C   |         | 4.8E-07  |        | 1.04       | Fractured/broken bones in last 5 years               |               | 34,780  | 359,241   | NEALE2_2463                   |
| 12p12.3-MGP     | rs1800801   | EHOA                  | T   | C   |         | 8.9E-07  | -0.012 |            | Creatinine                                           |               |         | 411,927   | UKBio_deCODE                  |
| 12p12.3-MGP     | rs1800801   | EHOA                  | T   | C   |         | 9.3E-07  |        | 1.04       | Fracture low trauma                                  |               | 35,439  | 431,047   | UKBio_deCODE                  |
| 12p12.3-MGP     | rs3887182*  | Correlated GWS        | A   | G   | 0.92    | 3.0E-213 | 0.721  |            | Blood protein levels [ART4, 6576_1_3]                | PMID:30072576 |         | 3,200     | GCST006585_131                |
| 12p12.3-MGP     | rs67482087* | Correlated GWS        | G   | T   | 0.98    | 8.0E-182 | 0.690  |            | Blood protein levels [ART4, 6576_1_3]                | PMID:30072576 |         | 3,200     | GCST006585_131                |
| 12p12.3-MGP     | rs2287226   | Correlated GWS        | G   | A   | 0.91    | 5.3E-33  | -0.220 |            | Hand grip strength (left)                            |               |         | 359,704   | NEALE2_46_raw                 |
| 12p12.3-MGP     | rs11056198  | Correlated GWS        | A   | G   | 0.91    | 7.7E-28  | -0.201 |            | Hand grip strength (right)                           |               |         | 359,729   | NEALE2_47_raw                 |
| 12p12.3-MGP     | rs2430689   | Correlated GWS        | G   | C   | 0.87    | 3.0E-16  | -0.016 |            | Heel bone mineral density                            | PMID:30598549 |         | 426,824   | GCST006979                    |
| 12p12.3-MGP     | rs67482087  | Correlated GWS        | G   | T   | 0.98    | 2.0E-15  | -0.199 |            | Blood protein levels [MGP, 6520_87_3]                | PMID:30072576 |         | 3,200     | GCST006585_1144               |
| 12p12.3-MGP     | rs4764133   | Correlated GWS        | T   | C   | 0.97    | 2.0E-15  | 0.830  |            | Osteoarthritis of the hand                           | PMID:28855172 |         | 12,754    | GCST009596                    |
| 12p12.3-MGP     | rs2430690   | Correlated GWS        | C   | T   | 0.84    | 3.0E-15  |        |            | Heel bone mineral density                            | PMID:30595370 |         | 446,000   | GCST007066                    |
| 12p12.3-MGP     | rs2430689   | Correlated GWS        | G   | C   | 0.87    | 5.0E-14  |        |            | Heel bone mineral density                            | PMID:30048462 |         | 394,929   | GCST006433                    |
| 12p12.3-MGP     | rs4764133   | Correlated GWS        | T   | C   | 0.97    | 5.0E-14  | 0.650  |            | Finger osteoarthritis severity (hand Klsu)           | PMID:33055079 |         | 2,994     | GCST90010717                  |
| 12p12.3-MGP     | rs2287226   | Correlated GWS        | G   | A   | 0.91    | 1.0E-12  | -0.002 |            | Hand grip strength                                   | PMID:29691431 |         | 334,825   | GCST005830                    |
| 12p12.3-MGP     | rs3887182   | Correlated GWS        | A   | G   | 0.92    | 2.0E-12  | -0.172 |            | Blood protein levels [MGP, 6520_87_3]                | PMID:30072576 |         | 3,200     | GCST006585_1144               |
| 12p12.3-MGP     | rs11614333  | Correlated GWS        | T   | C   | 0.91    | 2.0E-12  | -0.160 |            | Hand grip strength                                   | PMID:29313844 |         | 195,180   | GCST005235                    |
| 12p12.3-MGP     | rs4764133   | Correlated GWS        | T   | C   | 0.97    | 3.0E-12  | 0.810  |            | Hand osteoarthritis severity (hand Klsu)             | PMID:33055079 |         | 6,032     | GCST90010716                  |
| 12p12.3-MGP     | rs10846071  | Correlated GWS        | T   | C   | 0.92    | 4.0E-12  | -0.002 |            | Hand grip strength                                   | PMID:29691431 |         | 334,825   | GCST005830                    |
| 12p12.3-MGP     | rs10630224  | Correlated GWS        | TGC | T   | 0.76    | 1.4E-10  |        | 1.06       | Low hand grip strength (60 years and older) (EWGSOP) | PMID:33510174 |         | 256,523   | GCST90007526                  |
| 12p12.3-MGP     | rs10630224  | Correlated GWS        | TGC | T   | 0.76    | 3.2E-09  |        | 1.07       | Low hand grip strength (60 years and older) (EWGSOP) | PMID:33510174 |         | 135,468   | GCST90007527                  |
| 12p12.3-MGP     | rs11419786  | Correlated GWS        | TG  | T   | 0.63    | 1.3E-08  |        | 1.05       | Fractured/broken bones in last 5 years               |               |         | 359,241   | NEALE2_2463                   |
| 12p12.3-MGP     | rs11056244  | Correlated GWS        | A   | T   | 0.73    | 3.7E-08  | 0.524  |            | Impedance of arm (left)                              |               |         | 354,807   | NEALE2_23110_raw              |
| 15q21.3-ALDH1A2 | rs11631127  | EHOA                  | C   | G   |         | 1.2E-07  |        | 1.17       | Polyarthrosis                                        |               | 2,610   | 149,831   | FINNGEN_RS_M13_ARTHROSIS_POLY |
| 15q21.3-ALDH1A2 | rs11631127  | EHOA                  | C   | G   |         | 1.5E-07  | -0.094 |            | Hand grip strength (right)                           |               |         | 359,729   | NEALE2_47_raw                 |
| 15q21.3-ALDH1A2 | rs11631127  | EHOA                  | C   | G   |         | 1.9E-07  |        | 1.05       | Low hand grip strength (60 years and older) (EWGSOP) | PMID:33510174 | 34,589  | 135,468   | GCST90007527                  |
| 15q21.3-ALDH1A2 | rs11631127  | EHOA                  | C   | G   |         | 2.1E-07  |        | 0.97       | Knee pain   pain type(s) experienced in last month   |               | 76,628  | 360,391   | NEALE2_6159_7                 |
| 15q21.3-ALDH1A2 | rs11631127  | EHOA                  | C   | G   |         | 2.2E-07  |        | 0.96       | Knee_joint_operation                                 |               |         | 28,317    | UKBio_deCODE                  |
| 15q21.3-ALDH1A2 | rs11631127  | EHOA                  | C   | G   |         | 2.3E-07  |        | 1.04       | Low hand grip strength (60 years and older) (EWGSOP) | PMID:33510174 | 48,596  | 256,523   | GCST90007526                  |
| 15q21.3-ALDH1A2 | rs11631127  | EHOA                  | C   | G   |         | 3.8E-07  |        | 0.96       | Knee osteoarthritis                                  |               | 37,270  | 430,938   | UKBio_deCODE                  |
| 15q21.3-ALDH1A2 | rs11631127  | EHOA                  | C   | G   |         | 3.3E-07  | -0.091 |            | Hand grip strength (left)                            |               |         | 359,704   | NEALE2_46_raw                 |



|                 |            |                |   |       |      |         |      |                                                    |               |        |         |                               |
|-----------------|------------|----------------|---|-------|------|---------|------|----------------------------------------------------|---------------|--------|---------|-------------------------------|
| 15q21.3-ALDH1A2 | rs11631127 | EHOA           | C | G     |      | 4.7E-07 | 0.95 | Knee osteoarthritis                                | PMID:30664745 | 24,955 | 403,124 | GCST007090                    |
| 15q21.3-ALDH1A2 | rs4775006  | Correlated GWS | A | C     | 0.74 | 3.0E-22 |      | Brain region volumes [X4th ventricle]              | PMID:31676860 |        | 19,629  | GCST009518_4                  |
| 15q21.3-ALDH1A2 | rs4775006  | Correlated GWS | A | C     | 0.74 | 1.0E-18 |      | Subcortical volume (min-P)                         | PMID:32665545 |        | 26,502  | GCST010698                    |
| 15q21.3-ALDH1A2 | rs4775006  | Correlated GWS | A | C     | 0.74 | 2.0E-18 |      | Brain morphology (min-P)                           | PMID:32665545 |        | 26,502  | GCST010699                    |
| 15q21.3-ALDH1A2 | rs3204689  | Correlated GWS | C | G     | 0.65 | 1.0E-11 |      | Osteoarthritis (hand, severe)                      | PMID:24728293 |        | 78,162  | GCST002410                    |
| 15q21.3-ALDH1A2 | rs66725070 | Correlated GWS | G | GACAT | 0.73 | 3.0E-10 | 0.87 | Barrett's esophagus                                | PMID:27527254 |        | 23,326  | GCST003738                    |
| 15q21.3-ALDH1A2 | rs4775006  | Correlated GWS | A | C     | 0.74 | 8.4E-10 | 1.06 | Knee osteoarthritis                                | PMID:30664745 |        | 403,124 | GCST007090                    |
| 15q21.3-ALDH1A2 | rs8033270  | Correlated GWS | C | G     | 0.64 | 9.0E-10 | 0.84 | Polyarthrosis                                      |               |        | 149,831 | FINNGEN_R5_M13_ARTHROSIS_POLY |
| 15q21.3-ALDH1A2 | rs4775006  | Correlated GWS | A | C     | 0.74 | 7.1E-09 | 1.03 | Knee pain   pain type(s) experienced in last month |               |        | 360,391 | NEALE2_6159_7                 |

Association results assessed by UKBiobank associations at deCODE genetics, and by Open Targets Genetics (<https://genetics.opentargets.org/>) which summarizes association data for the variants in public datasets (UK Biobank, FinnGen, and GWAS Catalog). The site was accessed on February, 23rd, 2022. The look-up results for the EHOA variants are shown directly, and for correlated variants ( $r^2 > 0.60$ ) that have been reported to associate with a given trait at a GWS level in the Open Targets Genetics database. The effect allele, the other allele,  $r^2$  with EHOA variant at the locus, P value and beta or odds ratio (OR) are shown for each trait, along with publication ID, number of cases and/or overall study sample, and the Study ID. Associations with  $P < 1e-6$  are shown.

\*We note that this association is most likely due to a missense variant in ART4 which changes the binding of the Somalogic probe to the plasma protein

**Supplementary Table 11. Association of EHOA variants with bone density, grip strength and urate levels**

| Variant    | Chr   | EA | NEA | FN_BMD<br>(N = 107,310) |        | LS_BMD<br>(N = 106,228) |        | eBMD<br>(N = 398,823) |        | Grip strength<br>(N = 427,745) |        | Urate<br>(N = 411,640) |        |
|------------|-------|----|-----|-------------------------|--------|-------------------------|--------|-----------------------|--------|--------------------------------|--------|------------------------|--------|
|            |       |    |     | P value                 | Effect | P value                 | Effect | P value               | Effect | P value                        | Effect | P value                | Effect |
| rs17013495 | chr4  | T  | C   | 4.9E-04                 | 0.015  | 1.6E-09                 | 0.028  | 0.89                  | 0      | 1.9E-05                        | -0.010 | 8.5E-21                | 0.018  |
| rs11243284 | chr6  | C  | T   | 0.082                   | -0.008 | 0.0035                  | -0.015 | 0.78                  | -0.001 | 2.7E-03                        | -0.007 | 0.76                   | 0.001  |
| rs1800801  | chr12 | T  | C   | 1.4E-05                 | -0.019 | 8.9E-08                 | -0.025 | 1.4E-09               | -0.015 | 5.0E-35                        | -0.029 | 0.036                  | -0.004 |
| rs11631127 | chr15 | C  | G   | 0.59                    | -0.002 | 8.3E-07                 | 0.023  | 0.21                  | -0.003 | 9.8E-10                        | -0.014 | 0.95                   | 0      |

Results for eBMD, grip strength and urate levels are from the UK Biobank resource, run at deCODE genetics. Results for FN (femoral neck) and LS (lumbar spine) BMD are derived from our unpublished meta-analysis of BMD in Iceland, UK Biobank, and the publicly available GEFOS consortium (Zheng et al, Nature, 2015).

**Supplementary Table 12. Significant association of EHOA polygenic risk score with phenotypes in UK biobank**

| Phenotype                                   | P value | Effect /OR | N cases | N controls | N overall | nR2     |
|---------------------------------------------|---------|------------|---------|------------|-----------|---------|
| Grip strength (mean, age, sex, height adj.) | 6.0E-41 | -0.022     |         |            | 427,745   | 0.00048 |
| Other arthrosis (ICD10:M19)                 | 4.8E-29 | 1.05       | 73,440  | 357,607    |           | 0.00048 |
| Any OA                                      | 2.1E-19 | 1.04       | 103,173 | 327,874    |           | 0.00029 |
| Polyarthrosis (ICD10:M15)                   | 4.9E-17 | 1.08       | 12,326  | 418,612    |           | 0.00072 |
| Hand OA                                     | 4.7E-16 | 1.15       | 3,416   | 427,631    |           | 0.00175 |
| Pain due to OA                              | 7.5E-14 | 1.05       | 44,262  | 98,258     |           | 0.00053 |
| Pain in hands in last three months          | 2.8E-13 | 1.11       | 5,766   | 64,039     |           | 0.00174 |
| Heberden nodes with arthropathy             | 1.1E-12 | 1.30       | 758     | 428,428    |           | 0.00464 |
| Finger OA                                   | 1.3E-13 | 1.29       | 834     | 428,352    |           | 0.00407 |
| Other arthritis (ICD10:M13)                 | 6.3E-10 | 1.04       | 33,303  | 397,744    |           | 0.00021 |
| Operation of joint of finger (OPCS:Z83)     | 1.3E-09 | 1.10       | 4,289   | 426,758    |           | 0.00082 |

A PRS for EHOA was generated from the Icelandic, the Dutch, the US and Spanish EHOA datasets. The MHC region was excluded from the EHOA PRS. The results are shown from a scan of diverse phenotypes derived from the UK Biobank. Significance was set as  $P < 1.0 \times 10^{-5}$ , accounting for 5,000 main phenotypes. nR2 is the Nagelkerke's correlation coefficient.

**Supplementary Table 13. Association of finger, hand, thumb, knee, hip, spine, and all OA GWS variants from the GO consortium in EHOA meta-analysis**

| OA phenotype | Variant     | EA | NEA | EA_freq% | GO_locus_number | Associated GWS OA phenotypes | GO consortium results |         | EHOA_meta |         |
|--------------|-------------|----|-----|----------|-----------------|------------------------------|-----------------------|---------|-----------|---------|
|              |             |    |     |          |                 |                              | OR                    | P       | OR        | P       |
| FingerOA     | rs7294636   | A  | G   | 37.3     | 21              | finger                       | 1.16                  | 3.0E-16 | 1.36      | 6.8E-13 |
| FingerOA     | rs9396861   | A  | C   | 61.0     | 77              | hand,finger                  | 1.13                  | 9.3E-11 | 1.23      | 3.2E-06 |
| FingerOA     | rs11588154  | T  | G   | 16.6     | 7               | finger                       | 0.83                  | 6.1E-10 | 0.86      | 0.01    |
| FingerOA     | rs8031133   | T  | G   | 54.5     | 30              | hand, finger, thumb, knee    | 1.11                  | 1.1E-09 | 1.40      | 2.4E-14 |
| FingerOA     | rs11550348  | A  | G   | 11.0     | 45              | hand,finger                  | 0.84                  | 6.2E-09 | 0.76      | 1.9E-04 |
| HandOA       | rs11071366  | A  | T   | 61.4     | 30              | hand, finger, thumb, knee    | 0.90                  | 4.9E-17 | 0.71      | 7.1E-15 |
| HandOA       | rs3993110   | A  | C   | 60.8     | 10              | hand                         | 1.09                  | 3.8E-11 | 1.14      | 0.0028  |
| HandOA       | rs3771498   | T  | C   | 52.1     | 52              | hand, thumb, hip, all        | 0.92                  | 6.8E-11 | 0.86      | 2.8E-04 |
| HandOA       | rs8112559   | C  | G   | 88.6     | 45              | hand,finger                  | 1.13                  | 7.3E-11 | 1.32      | 1.8E-04 |
| HandOA       | rs10062749  | T  | G   | 26.9     | 73              | hand,thumb                   | 1.08                  | 2.0E-09 | 1.15      | 0.0029  |
| HandOA       | rs7748189   | A  | G   | 73.2     | 77              | hand,finger                  | 1.08                  | 6.1E-09 | 1.24      | 1.2E-05 |
| HandOA       | rs1560080   | A  | G   | 82.5     | 71              | hand                         | 0.91                  | 9.6E-09 | 0.84      | 0.0011  |
| ThumbOA      | rs4238326   | T  | C   | 60.7     | 30              | hand, finger, thumb, knee    | 0.89                  | 7.3E-12 | 0.71      | 7.4E-15 |
| ThumbOA      | rs2862851   | T  | C   | 46.5     | 52              | hand, thumb, hip, all        | 1.11                  | 3.2E-10 | 1.16      | 4.4E-04 |
| ThumbOA      | rs11588850  | A  | G   | 82.0     | 6               | thumb                        | 0.87                  | 3.5E-10 | 1.06      | 0.34    |
| ThumbOA      | rs10062749  | T  | G   | 26.9     | 73              | hand,thumb                   | 1.11                  | 1.3E-08 | 1.15      | 0.0029  |
| SpineOA      | rs201194999 | T  | C   | 30.1     | 69              | all,spine                    | 0.85                  | 1.2E-08 | 0.57      | 0.27    |
| KneeOA       | rs143384    | A  | G   | 59.1     | 53              | knee,all                     | 1.07                  | 1.0E-23 | 1.08      | 0.09    |
| KneeOA       | rs9940278   | T  | C   | 43.5     | 35              | knee,hip                     | 1.06                  | 3.2E-16 | 0.97      | 0.56    |
| KneeOA       | rs34195470  | A  | G   | 44.5     | 36              | knee                         | 0.95                  | 3.1E-13 | 0.99      | 0.85    |
| KneeOA       | rs4548913   | A  | G   | 62.8     | 37              | knee, all                    | 0.95                  | 3.2E-12 | 0.92      | 0.04    |
| KneeOA       | rs72760655  | A  | C   | 33.1     | 92              | knee,all                     | 1.05                  | 7.3E-11 | 1.05      | 0.29    |
| KneeOA       | rs7581446   | T  | C   | 48.3     | 50              | knee                         | 0.95                  | 1.7E-10 | 0.98      | 0.62    |
| KneeOA       | rs753350451 | D  | I   | 20.2     | 19              | knee                         | 0.93                  | 3.4E-10 | 0.98      | 0.77    |
| KneeOA       | rs58973023  | A  | T   | 48.9     | 27              | knee                         | 1.06                  | 4.7E-10 | 1.04      | 0.41    |
| KneeOA       | rs4775006   | A  | C   | 41.6     | 30              | hand, finger, thumb, knee    | 1.05                  | 8.5E-10 | 0.69      | 3.0E-16 |
| KneeOA       | rs4380013   | A  | G   | 18.8     | 29              | knee                         | 1.06                  | 8.7E-10 | 1.05      | 0.36    |
| KneeOA       | rs1426371   | A  | G   | 27.1     | 18              | knee                         | 0.95                  | 8.9E-10 | 1.03      | 0.51    |
| KneeOA       | rs66906321  | T  | C   | 17.5     | 51              | knee                         | 0.95                  | 1.7E-09 | 0.97      | 0.64    |
| KneeOA       | rs7967762   | T  | C   | 15.6     | 24              | knee                         | 1.06                  | 2.1E-09 | 1.08      | 0.19    |
| KneeOA       | rs72979233  | A  | G   | 75.3     | 15              | knee                         | 0.95                  | 2.5E-09 | 0.92      | 0.07    |
| KneeOA       | rs2163832   | T  | C   | 32.1     | 43              | knee,all                     | 1.05                  | 2.7E-09 | 1.23      | 6.2E-06 |
| KneeOA       | rs11705555  | A  | C   | 76.4     | 56              | knee                         | 1.05                  | 3.0E-09 | 1.00      | 0.97    |
| KneeOA       | rs2791549   | A  | C   | 29.6     | 5               | knee, hip                    | 1.05                  | 3.1E-09 | 1.05      | 0.26    |
| KneeOA       | rs10842226  | A  | G   | 42.0     | 22              | knee                         | 1.05                  | 3.6E-09 | 0.91      | 0.03    |
| KneeOA       | rs10974438  | A  | C   | 64.6     | 99              | knee                         | 1.04                  | 4.9E-09 | 1.07      | 0.14    |
| KneeOA       | rs6500609   | C  | G   | 11.0     | 34              | knee                         | 0.94                  | 5.2E-09 | 0.97      | 0.67    |
| KneeOA       | rs10038860  | A  | G   | 27.4     | 73              | knee                         | 1.05                  | 5.6E-09 | 1.16      | 0.0013  |
| KneeOA       | rs12914479  | C  | G   | 66.0     | 33              | knee                         | 1.04                  | 7.1E-09 | 1.07      | 0.13    |
| KneeOA       | rs2066928   | A  | G   | 48.3     | 75              | knee                         | 0.96                  | 1.2E-08 | 0.97      | 0.47    |
| KneeOA       | rs7680647   | T  | C   | 63.1     | 68              | knee,hip,all                 | 0.96                  | 1.2E-08 | 0.85      | 3.2E-04 |
| HipOA        | rs10843013  | A  | C   | 78.4     | 23              | hip                          | 0.90                  | 2.9E-24 | 0.96      | 0.46    |
| HipOA        | rs12209223  | A  | C   | 11.1     | 83              | hip                          | 1.15                  | 1.9E-22 | 1.16      | 0.03    |
| HipOA        | rs11164653  | T  | C   | 41.3     | 1               | hip,all                      | 0.92                  | 2.8E-18 | 1.01      | 0.84    |
| HipOA        | rs12908498  | C  | G   | 53.8     | 32              | hip                          | 1.08                  | 1.9E-16 | 1.06      | 0.18    |
| HipOA        | rs2416564   | T  | C   | 59.8     | 95              | hip                          | 0.93                  | 1.0E-15 | 1.06      | 0.18    |
| HipOA        | rs765002298 | D  | I   | 19.7     | 90              | hip                          | 0.90                  | 1.8E-15 | 1.03      | 0.58    |
| HipOA        | rs4252548   | T  | C   | 2.4      | 46              | hip                          | 1.25                  | 2.2E-15 | 1.36      | 0.03    |
| HipOA        | rs1046934   | A  | C   | 64.9     | 4               | hip                          | 1.07                  | 3.8E-14 | 0.99      | 0.80    |
| HipOA        | rs79895530  | T  | C   | 13.0     | 91              | hip                          | 0.90                  | 7.0E-14 | 1.05      | 0.42    |
| HipOA        | rs2268023   | A  | T   | 41.1     | 63              | hip                          | 1.07                  | 1.6E-13 | 0.95      | 0.21    |
| HipOA        | rs1913707   | A  | G   | 60.5     | 66              | hip,all                      | 1.07                  | 1.8E-13 | 1.06      | 0.16    |
| HipOA        | rs2862851   | T  | C   | 46.5     | 52              | hand, thumb, hip, all        | 1.07                  | 3.9E-13 | 1.16      | 4.4E-04 |
| HipOA        | rs9475400   | T  | C   | 9.8      | 82              | hip                          | 1.11                  | 8.0E-13 | 1.04      | 0.56    |
| HipOA        | rs111844273 | A  | G   | 2.1      | 89              | hip                          | 1.26                  | 1.0E-12 | 1.10      | 0.49    |
| HipOA        | rs6908606   | A  | G   | 71.1     | 81              | hip                          | 0.93                  | 3.9E-12 | 0.91      | 0.06    |
| HipOA        | rs2605098   | A  | G   | 33.2     | 5               | hip                          | 1.07                  | 6.8E-12 | 1.09      | 0.05    |
| HipOA        | rs1330349   | C  | G   | 58.9     | 93              | hip                          | 1.06                  | 6.9E-12 | 1.02      | 0.59    |
| HipOA        | rs4411121   | T  | C   | 31.4     | 2               | hip                          | 1.07                  | 2.2E-11 | 1.06      | 0.22    |
| HipOA        | rs12377624  | C  | G   | 36.2     | 97              | hip                          | 0.94                  | 4.6E-11 | 1.02      | 0.66    |
| HipOA        | rs143083812 | T  | C   | 0.11     | 86              | hip                          | 2.90                  | 8.2E-11 | 3.48      | 0.0087  |
| HipOA        | rs1401796   | A  | C   | 51.3     | 39              | hip,all                      | 0.94                  | 1.4E-10 | 0.97      | 0.52    |
| HipOA        | rs746239049 | D  | I   | 20.5     | 31              | hip                          | 0.92                  | 3.3E-10 | 0.89      | 0.05    |
| HipOA        | rs12160491  | A  | G   | 71.1     | 57              | hip                          | 0.94                  | 4.4E-10 | 1.01      | 0.81    |
| HipOA        | rs67924081  | A  | G   | 73.9     | 13              | hip                          | 1.07                  | 7.8E-10 | 1.02      | 0.71    |
| HipOA        | rs10831477  | T  | G   | 81.1     | 17              | hip,all                      | 1.07                  | 1.2E-09 | 1.01      | 0.81    |
| HipOA        | rs9835230   | A  | G   | 24.3     | 61              | hip                          | 1.07                  | 1.3E-09 | 1.11      | 0.04    |
| HipOA        | rs2521348   | T  | C   | 38.7     | 41              | hip                          | 1.06                  | 1.6E-09 | 0.94      | 0.14    |
| HipOA        | rs34560402  | T  | C   | 6.5      | 14              | hip                          | 0.89                  | 1.6E-09 | 0.96      | 0.63    |
| HipOA        | rs9940278   | T  | C   | 43.5     | 35              | knee,hip                     | 1.06                  | 1.8E-09 | 0.97      | 0.56    |
| HipOA        | rs3740129   | A  | G   | 45.9     | 8               | hip                          | 1.06                  | 1.8E-09 | 1.05      | 0.25    |
| HipOA        | rs79056043  | A  | G   | 93.7     | 25              | hip                          | 0.89                  | 2.0E-09 | 0.84      | 0.05    |
| HipOA        | rs79220007  | T  | C   | 92.7     | 78              | hip                          | 0.90                  | 2.2E-09 | 1.01      | 0.91    |

|       |             |   |   |      |    |                       |      |         |      |         |
|-------|-------------|---|---|------|----|-----------------------|------|---------|------|---------|
| HipOA | rs798756    | T | C | 19.4 | 68 | knee,hip,all          | 0.93 | 2.2E-09 | 0.85 | 0.0044  |
| HipOA | rs4073717   | T | G | 20.1 | 74 | hip                   | 0.94 | 2.5E-09 | 0.90 | 0.05    |
| HipOA | rs17677724  | T | C | 16.1 | 72 | hip,all               | 1.07 | 3.5E-09 | 1.12 | 0.05    |
| HipOA | rs1809889   | T | C | 28.0 | 20 | hip                   | 1.06 | 3.6E-09 | 1.07 | 0.17    |
| HipOA | rs10983775  | T | C | 54.2 | 96 | hip                   | 0.95 | 4.7E-09 | 0.99 | 0.80    |
| HipOA | rs66989638  | A | G | 12.7 | 48 | hip                   | 1.08 | 4.8E-09 | 1.00 | 0.97    |
| HipOA | rs7862601   | A | G | 62.4 | 94 | hip                   | 0.94 | 6.2E-09 | 0.94 | 0.15    |
| HipOA | rs7222178   | A | T | 19.5 | 40 | hip                   | 1.07 | 7.4E-09 | 1.01 | 0.82    |
| HipOA | rs10940168  | A | G | 39.4 | 76 | hip                   | 0.95 | 7.7E-09 | 1.01 | 0.76    |
| HipOA | rs6855246   | A | G | 92.8 | 64 | hip,all               | 0.90 | 7.9E-09 | 1.08 | 0.53    |
| HipOA | rs10465114  | A | G | 22.0 | 98 | hip                   | 1.06 | 9.0E-09 | 1.01 | 0.89    |
| AllOA | rs13107325  | T | C | 7.1  | 64 | hip,all               | 1.08 | 3.2E-17 | 0.94 | 0.65    |
| AllOA | rs3771501   | A | G | 46.8 | 52 | hand, thumb, hip, all | 1.04 | 4.0E-15 | 1.16 | 6.4E-04 |
| AllOA | rs1913707   | A | G | 60.5 | 66 | hip,all               | 1.03 | 1.4E-12 | 1.06 | 0.16    |
| AllOA | rs2425061   | A | G | 62.8 | 53 | knee,all              | 1.03 | 2.1E-12 | 0.94 | 0.14    |
| AllOA | rs216175    | A | C | 82.8 | 37 | all                   | 1.04 | 2.7E-12 | 1.09 | 0.11    |
| AllOA | rs2622873   | T | C | 88.0 | 1  | hip,all               | 1.05 | 4.2E-11 | 1.03 | 0.66    |
| AllOA | rs10405617  | A | G | 31.9 | 43 | knee,all              | 1.03 | 9.3E-11 | 1.22 | 1.5E-05 |
| AllOA | rs12901372  | C | G | 52.7 | 32 | all                   | 1.03 | 1.0E-10 | 1.07 | 0.10    |
| AllOA | rs11731421  | A | G | 34.6 | 68 | knee,hip,all          | 1.03 | 1.9E-10 | 1.19 | 1.0E-04 |
| AllOA | rs75621460  | A | G | 2.6  | 44 | all                   | 1.10 | 1.1E-09 | 1.06 | 0.65    |
| AllOA | rs4979341   | T | C | 27.5 | 92 | knee,all              | 1.03 | 1.4E-09 | 1.04 | 0.41    |
| AllOA | rs12667224  | A | G | 52.0 | 85 | all                   | 0.97 | 1.7E-09 | 0.96 | 0.30    |
| AllOA | rs62242105  | A | G | 33.1 | 62 | hip                   | 0.97 | 2.9E-09 | 1.01 | 0.79    |
| AllOA | rs201194999 | T | C | 30.1 | 69 | all,spine             | 0.88 | 3.1E-09 | 0.57 | 0.27    |
| AllOA | rs62182810  | A | G | 54.4 | 49 | all                   | 1.03 | 3.8E-09 | 1.07 | 0.15    |
| AllOA | rs11729628  | T | G | 23.9 | 65 | all                   | 0.97 | 4.7E-09 | 0.91 | 0.05    |
| AllOA | rs1401795   | A | G | 50.0 | 39 | all                   | 1.03 | 6.2E-09 | 1.03 | 0.47    |
| AllOA | rs10831476  | A | C | 81.1 | 17 | hip,all               | 1.03 | 7.8E-09 | 1.01 | 0.82    |
| AllOA | rs17677555  | C | G | 25.6 | 72 | hip,all               | 1.03 | 1.1E-08 | 1.08 | 0.13    |

The Genetics of Osteoarthritis (GO) consortium data is from Boer et al, Cell, 2021. OR (odds ratio) and P values and ORs are shown for the respective osteoarthritis (OA) phenotypes in the GO consortium data. The OA phenotypes that are significantly associated with the respective signal in GO are listed under the column "Associated GWS OA phenotypes" (often represented by a different, but highly correlated, variant).
